# Supplementary material for: Transcriptome Analysis of Fusarium–Tomato Interaction Based on an Updated Genome Annotation of Fusarium oxysporum f. sp. lycopersici Identifies Novel Effector Candidates That Suppress or Induce Cell Death in Nicotiana benthamiana
Source: MDPI journal article supplement (doi:10.3390/jof8070672), 2022-06-26
Supplement: s1 [file s1]

# Signal peptide

|          |   |                                |                           |              |
|----------|---|--------------------------------|---------------------------|--------------|
| Fol-EC14 | 1 | MRTA-AF--I-TLLASVVSAT----      | PFGQR-----SQVLARASETCPVVF | DGRVPANASL   |
| Fuspro1  | 1 | MRTA-AF--V-TLLASVVSAS----      | PFGQR-----SQVLARASETCPVVF | DGRVPANASL   |
| Fusman1  | 1 | MRTA-AF--I-ALLASVVSAS----      | PFGQR-----SQVLARASETCPVVF | DGRVPANASL   |
| Fusfuj1  | 1 | MRTA-AF--I-TLLASVVSAT----      | PFGQR-----SQVLARASETCPVVF | DGRVPANASL   |
| Fusnyg1  | 1 | MRTA-AV--I-TLLASVVSAT----      | PFGQR-----SQVLARASETCPVVF | DGRVPANASL   |
| Fusver1  | 1 | MRTA-SV--I-TLLASVVSAT----      | PFGQR-----SQVLPRASETCPVVF | DGRVPANASL   |
| Fuscul1  | 1 | MRAA-AI--I-ALFASVAFAA----      | PADSR-----SCSKAKNTCPVVF   | DGRVPANASL   |
| Fusgra1  | 1 | MRAA-AI--I-ALFASVAFAA----      | PADSR-----SCSKAKNTCPVVF   | DGRVPANASL   |
| Fuspse1  | 1 | MRAA-AV--I-ALFASVAFAA----      | PADSR-----SCSKAKNTCPVVF   | DGRVPANASL   |
| Fuslan1  | 1 | MRAA-AI--I-TLLASVASAA----      | PADNR-----SCSKAKNTCPVVF   | DGRVPANASL   |
| Fuspoa1  | 1 | MRAA-AI--I-TLLASVASAA----      | PADDR-----SCSKAKNTCPVVF   | DGRVPANAIL   |
| Fusven1  | 1 | MRAA-AI--I-TLLASVASAA----      | PADDR-----SCSKAKNACPVVF   | DGRVPANAIL   |
| Neodit1  | 1 | MHRS-AV--F-ALLASAAASAA----     | PF-HG-----FHAFTNKSSSCPVVF | DGRVPANASL   |
| Fussol1  | 1 | MRAA-AF--F-ALVSSVVSAT----      | PLGHR-----FHTYSKASNSCAVVF | DGRVPANASL   |
| Colchl1  | 1 | MPLQ-VI--I-LLLTVALAT----       | TKP-----CTPPPLTKCPVVF     | DGRVPSEFAIS  |
| Colfio1  | 1 | MRSSFLI-PI-LLAIPSSLAS----      | PSP-----CLTATIQCPIVF      | DGRVPVTAIP   |
| Colnym1  | 1 | MRSPFLI-PI-LLAIPSAALGS----     | PSP-----CTAAAIQCPIVF      | DGRVPATAIP   |
| Colsim1  | 1 | MRSPFLI-PF-LLAIPSAALAS----     | PSP-----CLTATIQCPIVF      | DGRVAPATAIP  |
| Colglo1  | 1 | MHP-----L-TLLTLATPAL----       | SVTL-----TCRSL-TRCPLIF    | DGRVPESTAIP  |
| Colgral  | 1 | MFSR-AA-LL-LLLTTPATLAA----     | ATP-----NCHAAAVRCPIVF     | DGRVPAVAIP   |
| Colincl  | 1 | MFSH-TA--L-LLLAAPALAA----      | STL-----GCRAASIKCPIVF     | DGRVPATAIP   |
| Coltof1  | 1 | MLPH-TA--L-LLLAAPAAFTA----     | ATL-----NCRAASIKCPIVF     | DGRVPATAIP   |
| Colhig1  | 1 | MIPP-AA--L-LLALAILAA----       | SSPS-----NCGAASIRCPVVF    | DGRVPAAAVP   |
| Colorb1  | 1 | MRLF---L-LLSILFLSLTLAA----     | -----SLRCSAPSIQCPIVF      | DGRVPESTAIP  |
| Veralf1  | 1 | MLPS-VLTVL-SALVASSIAK----      | PVT-----KCRQAAMTCPIVF     | DGRVPQATV    |
| Verdah1  | 1 | MLPS-VLTVL-SALVASSLAK----      | PVT-----KCRQAAMTCPIVF     | DGRVPQATAV   |
| Verlon1  | 1 | MLPS-VLTVL-SALVASSFAK----      | PVT-----KCRQAAMTCPIVF     | DGRVPQATV    |
| Lompro1  | 1 | MFRS-----L-FFLALAQAAF----      | ALP-----AAEPSCPVVF        | DGRVPADAEP   |
| Sceapi1  | 1 | MFRS-----L-LLLALTQGIF----      | ALP-----AAEPSCPVVF        | DGRVPKDAISL  |
| Chathe1  | 1 | MHR--SL-LL-TLLTTAIAVLARP----   | PSRHPS--PSAAAAPCTTKCPIVF  | DGRVKTITTQ   |
| Madmyc1  | 1 | MHH--AI-LL-SLL-TAGTAVTAR----   | PSFSQEP--PINQHVATAIQCPVVF | DGRVGCATTEL  |
| Thiter1  | 1 | MHR--AT-LV-GLLAAAATTVTGA----   | PSCSG----VHAAAPCTVKCPIVF  | DGRVKATAAL   |
| Thethe1  | 1 | MHST-TT-LL-SLLSAAAAAANGASL---- | PRDSV-----CGAAAEIQCPVVF   | DGRVSADAQP   |
| Conlig1  | 1 | MVHQ-TL-LL-ALLSALTVSAR----     | P-----SKCAAEPKCPVVF       | DGRVKTTLVP   |
| Daldsp1  | 1 | MISS-AL-FTGFLASSASAR----       | PT-----KRGTCETKCPVVF      | ILNGFVPADLTP |
| Hyposp1  | 1 | MISS-AL-LTGLLLTSSASAH----      | PT-----KRGTCETKCPVVF      | LSGFFVPVDKTP |
| Rosnec1  | 1 | MVSS-TL-LLGGILAAATLSFALP----   | PSPPE-----RRGACATKCPVVF   | LNGLVGVSLTP  |
| Phamin1  | 1 | MVSY-TL-VF-AALAAAVSGA----      | P-----CASNATIKCPIVF       | DGRVLAASAA   |
| Spobra1  | 1 | MKAFSSL-LF-AGVAAAV-----        | PTGQA----ADADTPAATVKCPIVF | DGRVPSTLAL   |
| Sposch1  | 1 | MKAFSSL-LF-AGVAAAV-----        | PTGQA----ADADAPAATVKCPIVF | DGRVPSTLVL   |
| Spoins1  | 1 | MHALASI-LITAGVAVAVPASSSSS----  | SSAAASTP-TAAAAAAATVKCPIVF | DGRVPSLKL    |
| Podans1  | 1 | MHP--SL-LL-GLLAGTALAGTIRRP---- | BGRPR-----PQAPTAETLCPIVF  | DGRVPDSSLEP  |
| Neucra1  | 1 | MLT--PT-IL-TLLFTLTATTALAV----  | BQPH-----AALIKCPVVF       | DGRVKIHTQ    |
| Neutet1  | 1 | MLT--PT-IL-TLLFTLTATTALAV----  | BPHPH-----AALIKCPVVF      | DGRVKTTRTQ   |
| Sormac1  | 1 | MHA--ST-IF-GFLAAAATAVLAV----   | BPHPH-----EKAADVCPVVF     | DGRVKSRTL    |
| Pesfic1  | 1 | MFS--QI-VMSSLLATLATAR----      | PSP-----RAAASCPVVF        | LSGRVPASAQ   |
| Psevex1  | 1 | MFSV-AL-VF-GLTATAASAG----      | PL-----LTPRIDITCPIVF      | LEGRVASSTAL  |
| Eutlat1  | 1 | MVSS-TI-LV-SLFASLAVARR----     | BGRRQ-----GSCTITCPIVF     | DGRVPVDTL    |
| Gaetri1  | 1 | MTLA-RH-LANALLAVAVAVA----      | -----GAAEVKCPVVF          | DGRVPASIAL   |
| Magory1  | 1 | MPLA-AI-IPALLLAAAAAATAAT----   | PLSPR-----AADPACPIRCPIVF  | DGRVPATLAA   |
| Maggril  | 1 | MPLA-PL-FSVLLLAAAASAT----      | PLAVR-----AADPTGTICPIVF   | DGRVPTTLVS   |
| Conlus1  | 1 | MLFT-SP-IL-ALSALVAIAT----      | ASPRICQTHASKTTNSSTIKCPVVF | DGRVPANASL   |
| Diaamp1  | 1 | MFSA-SL-LL-ALGTTAVAAI----      | PYETR-----SPSSGVVQCPVVF   | LEGRVPASSVL  |
| Diahell  | 1 | MFSV-SL-LL-GLGATIAAAI----      | PSGPR-----SLTSCSVKCPVVF   | FEGRVPTSTIL  |
| Micbol1  | 1 | MALK-AF-FTTSLVALASLASALP----   | PVPGR-----PGATATKISCPVVF  | ESGQPIAAKL   |

|          |    |                                      |                           |
|----------|----|--------------------------------------|---------------------------|
| Fol-EC14 | 48 | TDFDTANGGGWNPYNPGFVKGNISWSEILQLP     | -----K-TKT-----K-SRF      |
| Fuspro1  | 48 | TDFDTANGGGWNPYNPGFVKGNISWSEILQLP     | -----K-TKT-----K-SRF      |
| Fusman1  | 48 | TDFDTANGGGWNPYNPGFVKGNISWSEILQLP     | -----K-TKT-----K-SRF      |
| Fusfuj1  | 48 | TDFDTANGGGWNPYNPGFVKGNISWSEILQLP     | -----K-TKT-----K-SRF      |
| Fusnyg1  | 48 | TDFDTANGGGWNPYNPGFVKGNISWSEILKLP     | -----K-TKT-----K-SRF      |
| Fusver1  | 48 | TDFDTANGGGWNPYNPGFVKGNISWSEILKLP     | -----K-TKT-----K-SRF      |
| Fuscul1  | 46 | ADFDKENGGGWNPYNPGFVKGNISWSEILKLP     | -----Q-TTP-----SRF        |
| Fusgral  | 46 | TDFDKENGGGWNPYNPGFVKGNISWSEILKLP     | -----Q-TTP-----SRF        |
| Fuspsel  | 46 | TDFDKENGGGWNPYNPGFVKGNISWSEILKLP     | -----Q-TTP-----SRF        |
| Fuslan1  | 46 | SDFDKENGGGWNPYNPGFVKGNISWSEIVKLP     | -----Q-TTP-----SRF        |
| Fuspoal  | 46 | ADFDKENGGGWNPYNPGFVKGNISWSEILKLP     | -----Q-TTP-----SRF        |
| Fusven1  | 46 | ADFDKENGGGWNPYNPGFVKGNISWSEIVKLP     | -----Q-TTP-----SRF        |
| Neodit1  | 47 | ADFDIARGGGWNPFPNGYVKGNLSWSDILLLP     | -----N-HVP-----A-SRF      |
| Fussol1  | 48 | TDFDTENGGGWNPFPNGYVKGNISWSEILLLP     | -----K-NTP-----R-SRF      |
| Colchl1  | 44 | IDFNIAQGGGWSPFNPDYVKGSLSWSDILLLP     | -----D-AVP-----P-SRF      |
| Colfiol  | 45 | RDFDTSLGGGWNPYNPDYVKGTNLSWSDILLLP    | -----G-PAPVTRPGSRS-SRF    |
| Colnym1  | 45 | QDFDTALGGGWNPYNPDYVKGASLSWSDILLLP    | -----E-SAPVSTRPGSRS-SRF   |
| Colsim1  | 45 | QDFDTALGGGWNPYNPDYVKGTNLSWSDILLLP    | -----E-SAPVSTRPGSRS-SRF   |
| Colglo1  | 41 | TDFDTPNGGGWNPFPNPSYVKGNTLLWSDIVLLP   | -----SGP-----T-SRF        |
| Colgral  | 45 | QDFDTASGGGWNPYNPGYVKGEGLLWSDIILLLP   | LSPSQEEEE-AAP-----P-SRF   |
| Colincl  | 44 | QDFDSASGGGWNPYNPGYVKGEGLLWSDIILLLP   | -----Q-VAP-----P-SRF      |
| Coltofl  | 44 | QDFDSASGGGWNPYNPGYVKGEGLLWSDIILLLP   | -----Q-VAP-----P-SRF      |
| Colhigl  | 45 | GDFDSASGGGWNPYNPDYVKGKGLLWSDIILLLP   | -----R-AGP-----P-SRF      |
| Colorbl  | 43 | TDFDSSST--WNPYNPSYVKGASLFWSEILLFP    | -----PTP-----P-SRF        |
| Veralfl  | 46 | QDFDTAGGGGNPFPNPNEVKGNLTSWSEILLFP    | -----T-ITP-----A-SRF      |
| Verdah1  | 46 | QDFDTAGGGGNPFPNPNEVKGNLTSWSEILLFP    | -----T-ITP-----A-SRF      |
| Verlon1  | 46 | QDFDTAGGGGNPFPNPNEVKGNLTSWSEILLFP    | -----T-ITP-----A-SRF      |
| Lompro1  | 39 | TDFDANNGGGWMPFNPSGYVKGETLKWSEILQFP   | -----E-VAE-----A-SRF      |
| Sceapi1  | 39 | TDFDANNGGGWMPFNPSGYVKGETLKWSEILKLP   | -----E-VAE-----A-SRF      |
| Chathel  | 54 | TDFDSYST---SPFNPDYVKGOTLKWSDIILKFP   | -----S-VS-----P-SRF       |
| Madmyc1  | 53 | TDFDSYGT---SIFNPDYVKGONLKWSDIILKFP   | -----E-VA-----N-SRF       |
| Thiter1  | 51 | TDFDSAST---SPFNPDYVKGNLKLKWSQIILKFP  | -----Q-TS-----N-ARF       |
| Thethe1  | 51 | TDFDSAST---SIFNPDYVKGNLKLKWSDIILQFP  | -----D-AG-----T-THF       |
| Conlig1  | 44 | TDFDSYAT---SPFNPDYVKGNLKLKWSDIILQFP  | -----T-DVG-----T-SRF      |
| Daldsp1  | 45 | TDFDSYAT---SPFNPDYIRGSE-KESSEILQFP   | -----E-VE-----S-SRF       |
| Hyposp1  | 45 | TDFDSYAT---SPFNPDYIRGSE-KESQIILLFP   | -----D-AG-----S-SRF       |
| Rosnec1  | 51 | ADFDASYAT---SPFNPDYVRGGE-KESQTLRF    | -----A-VAA-----S-SRF      |
| Phamin1  | 43 | TDLDSSST---SPFNPDYVKGNLSLKWSNIILLFP  | -----S-VP-----N-SRF       |
| Spobral  | 48 | TDFDSYSKG---SPFNAEYVKGNLDLKWSEILLFP  | -----S-VP-----T-SRF       |
| Sposchl  | 48 | TDFDSYSKG---SPFNAEYVKGNLDLKWSEILLFP  | -----S-VP-----T-SRF       |
| Spoins1  | 58 | ADFDASGSG---SPFNPGYVKGNLDLKWSDIILLFP | -----S-VA-----APSRF       |
| Podans1  | 51 | LDFDDWNT---SPFNPDYVKGAGLPWSSIILQFP   | -----D-ISP-----P-ARF      |
| Neucral  | 45 | TDFDSSAT---SLFNPDYVKGSSLKWSQIILQFP   | -----EGDKG-----SRF        |
| Neutet1  | 45 | TDFDSSAT---SLFNPDYVKGSSLKWSQIILQFP   | -----EGDKG-----SRF        |
| Sormac1  | 47 | TDFDSSST---SLFNPDYVKGSSLKWSQIILKFP   | -----K-EKG-----SRF        |
| Pesfic1  | 42 | TDFDSSAT---SLFNPDYVRASALPWSQIILLFP   | -----N-VT-----N-SRF       |
| Psevex1  | 44 | SDFDSYST---SIFNPDYVRGSQ-PWSQIILVFS   | -----N-TT-----N-SRF       |
| Eutlat1  | 46 | ADFDASYAT---SPFNPDYIRGDE-SESEITLLFP  | -----D-VP-----N-SRF       |
| Gaetril  | 41 | TDFDSPGRG---SPFGTGYVKGEGLLWSDIILKFP  | -----TAAAG-----P-PRF      |
| Magory1  | 52 | TDLDDAAR---SPFNTPGYVKGEGLKWSDIIEFP   | -----A-GAG-----Q-PRF      |
| Maggril  | 49 | TDLDATR---SPFNTPGYVKGEGLKWSDIILKFP   | -----T-EVG-----Q-PRF      |
| Conlus1  | 54 | TSFDTIAN---GLFNPDYVKGNLSWSDIILLFP    | -----T-VAT-----N-SRF      |
| Diaamp1  | 47 | TDFDVEN---DLFNPGYTKGNLSWSDIILLFP     | -----D-VA-----N-SRF       |
| Diahell  | 47 | KEFDVEN---ELFNPDYVKGNLTSWSDIVRF      | -----D-VP-----N-SRF       |
| Micbol1  | 52 | TDFDAAAT---SLFNPNVKGND-TWSQIILKFP    | -----AAAGAAP---GNAACGLARF |

|          |    |                |                   |                     |                |                 |
|----------|----|----------------|-------------------|---------------------|----------------|-----------------|
| Fol-EC14 | 89 | DI-----EAGTI   | PLEVTISDKSIFMKQLG | FRRAGLQFNKDSNEG     | SPGSKGVKTLHFS  | IM              |
| Fuspro1  | 89 | DT-----EAGTI   | PLEVTISDKSIFMKQLG | FRRAGLQFNKDSNEG     | SPGSKGVKTLHFS  | IM              |
| Fusman1  | 89 | DT-----EAGTI   | PLEVTISDKSIFMKQLG | FRRAGLQFNKDSNEG     | SPGSKGVKTLHFS  | IM              |
| Fusfuj1  | 89 | DT-----EAGTI   | PLEVTISDKSIFMKQLG | FRRAGLQFNKDSNEG     | SPGSKGVKTLHFS  | IM              |
| Fusnyg1  | 89 | DT-----EAGTI   | PLEVTISDKSIFMKQLG | FRRAGLQFNKDSNEG     | SPGSKGVKTLHFS  | IQ              |
| Fusver1  | 89 | DT-----EAGTI   | PLEVTISDKSIFMKQLG | FRRAGLQFNKDSNEG     | SPGSKGVKTLHFS  | IQ              |
| Fuscul1  | 86 | DV-----SGKTL   | PLEVTISDKSIFMKQLG | FRRAGLQFSKDKNEG     | SPGSEGIKTLHFS  | IM              |
| Fusgral  | 86 | DV-----SGKTL   | PLEVTISDKSIFMKQLG | FRRAGLQFSKDKNEG     | SPGSEGIKTLHFS  | IM              |
| Fuspse1  | 86 | DV-----SGKTL   | PLEVTISDKSIFMKQLG | FRRAGLQFSKDKNEG     | SPGSEGIKTLHFS  | IM              |
| Fuslan1  | 86 | DV-----SGKTL   | PLEVTISDESIFMKQV  | GFRAGLQFSKDKNED     | SPGSEGIKTLHFS  | IM              |
| Fuspoa1  | 86 | DA-----TGKTL   | PLEVTISDESIFMKQV  | GFRAGLQFSKDKNEG     | SPGSEGIKTLHFS  | LI              |
| Fusven1  | 86 | DA-----SGKTL   | PLEVTISDESIFMKQV  | GFRAGLQFSKDKNEG     | SPGSEGIKTLHFS  | IM              |
| Neodit1  | 88 | DA-----AAA     | VPVEVTIAD         | ESIFMKQNGFRAGLQFN   | DANEDSPASEGV   | ITLHFSLL        |
| Fussol1  | 89 | DA-----VSR     | TVPLKVTISDESIFMQH | GFRAGLQFAKDDNEK     | SPASEGVKTLHFS  | IL              |
| Colchl1  | 85 | DR-----AQNR    | PLEV              | TISDESIFMSQRGFRAGL  | LFAGDINTGSPAST | GVKTLHFSVR      |
| Colfiol  | 94 | DA-----AEKRR   | SLEV              | TISDASIFMQQLFRAGL   | LFSGDANEGSPAGE | GVKTLHFSVR      |
| Colnym1  | 94 | DA-----AEKKR   | ALEV              | TISDASIFMNQRGFRAGL  | LFAGDINEGSPAGE | GVKTLHFSVR      |
| Colsim1  | 94 | DA-----AEKKR   | ALEV              | TISDASIFMNQRGFRAGL  | LFAGDINEGSPAGE | GVKTLHFSVR      |
| Colglo1  | 81 | DA-----AAGSR   | ALEV              | TISDESIFMSQRGFRAGL  | QFAADANTGSPAGE | GAKTLHFSVR      |
| Colgral  | 95 | DA-----GGGTR   | PLEV              | TISDRSIFMNQRGFRAGL  | QFAADANVGSPAA  | AGVKTLHFSVR     |
| Colincl  | 85 | DS-----REKKR   | PLEV              | TISDKSIFMSQRGFRAGL  | QFAKDINVGSPAGT | GAKTLHFSVR      |
| Coltofl  | 85 | DA-----REEKR   | PLEV              | TISDKSIFMDQRGFRAGL  | QFAMDANVGSPAGT | GAKTLHFSVR      |
| Colhigl  | 86 | DA-----GEERR   | PLEV              | TISDASIFMDQRGFRAGL  | QFAGDANVGCPAG  | AGVKTLHFSVR     |
| Colorbl  | 81 | DT-----LPSTR   | ALEV              | TISDSSIFMNQRGFRAGL  | QFLADINTGSPA   | AKGVITLHFSVA    |
| Veralfl  | 87 | DA-----AKNTR   | PLEV              | TISDESIFMTQLGFRAGL  | QFANDTGS       | SPGSVGVKTLHFSVQ |
| Verdah1  | 87 | DA-----AKNTR   | PLEV              | TISDESIFMTQLGFRAGL  | QFANDTGS       | SPGSVGVKTLHFSVQ |
| Verlon1  | 87 | DA-----AKNTR   | PLEV              | TISDESIFMTQLGFRAGL  | QFANDTGS       | SPGSVGVKTLHFSVQ |
| Lompro1  | 80 | DA-----DAGTI   | PVEVTISDKSIFMTQNG | FRRAGLQFLKDN        | NEGSPATIGKKT   | ITLHFSLR        |
| Sceapi1  | 80 | DS-----DSGTV   | PLEV              | TISDKSIFMTQNGFRAGL  | QFLKDSNEGSPASK | GKKTITLHFSLR    |
| Chathel  | 91 | DD-----PDQHK   | PLEV              | TISDASIFMNQRGFRAGL  | QFQGDSNTGSA    | GSKGVKTLHFSVR   |
| Madmyc1  | 90 | DN-----ETHKP   | PLEV              | TISDASIFQSQRGFRAGL  | QFQGDSNNGSPGSS | GVKTLHFSVR      |
| Thiter1  | 88 | DN-----NSTKA   | LEV               | TISDASIFQSQRGFRAGL  | QFQGDINNGSPG   | ITGVKTLHFSIK    |
| Thethe1  | 88 | DN-----ETHKP   | PLEV              | TISDESIFQSQRGFRAGL  | QFNGDINNGSPGS  | QGVKTLHFSVK     |
| Conlig1  | 82 | DN-----ASYKP   | PLEV              | TISDASIFQQQNGFRAGL  | QIQGDINTGSPANT | GVITLHFSVR      |
| Daldsp1  | 81 | DN-----ESTRA   | LEV               | TINDKSIFQKQNGFRAGL  | QIQGDINENGP    | GTGVRTLHFSVK    |
| Hyposp1  | 81 | DN-----ASTKS   | LEV               | TINDKSIFQQTQNGFRAGL | QIQGDINENGP    | GTGVRTLHFSVK    |
| Rosnec1  | 88 | DN-----ASTKA   | LEV               | TINDRSIFQAONGFRAGL  | QIQGDINEGSPG   | IVGITLHFSVK     |
| Phamin1  | 80 | DN-----ASHRP   | LEV               | TISDKSIFQSQNGFRAGL  | QFAGDSNNGSPGY  | TGIKTLHFSVK     |
| Spobral  | 86 | DAAVNTSGAAAFKA | LEV               | TISDKSIFQKQNGFRAGL  | QLNGDINTGSPG   | FTGIKTLHFSVK    |
| Sposchl  | 86 | DAAVNTSGAAAFKA | LEV               | TISDKSIFQKQNGFRAGL  | QLNGDINTGSPG   | FTGIKTLHFSVK    |
| Spoins1  | 97 | DAAVNSSGAKPFQ  | AVE               | TISDKSIFQKQNGFRAGL  | QFNGDINTGSPGY  | TGIKTLHFSVQ     |
| Podans1  | 89 | DD-----PTYQK   | PLEV              | TINDSSIFNNQRGFRAGL  | QFQGDINRDSPGSS | SGIKTITLHFSLK   |
| Neucral  | 83 | DG-----CSHKP   | LEV               | TIASVFKTQYGFRRAGL   | IFENGDKNIGSPA  | SRGVKTLHFSVR    |
| Neutet1  | 83 | DS-----CSHKP   | LEV               | TIASVFKTQYGFRRAGL   | IFENGDKNIGSPA  | SRGVKTLHFSVR    |
| Sormac1  | 84 | DN-----CSHKP   | LEV               | TISDESVEKTOYGFRRAGL | IFEAADINTGSPA  | SKGVKTLHFSVK    |
| Pesfic1  | 79 | DG-----ADFKS   | LEV               | TISEKSIFQQTQNGFRAGL | QLANDINTQGP    | GTGVRTLHFSVK    |
| Psevex1  | 80 | EN-----ASYKS   | LEV               | TISDQSIFQSQNGFRAGL  | QINGDINTGCPG   | SGSKGVKTLHFSVK  |
| Eutlat1  | 82 | DD-----EGFKS   | LEV               | TISDLISIFQEQNGFRRT  | GLQIQGDENEGGP  | GTGVKTLHFSVK    |
| Gaetril  | 81 | EN-----ASLHK   | PITV              | TISDRSIFQQTQRGFRAGL | QFDGDSNTGGE    | GSAGVRTLHFSVK   |
| Magory1  | 90 | ED-----AASHK   | PITV              | TISDRSIFQQTQRGFRAGL | QFRDDANACGAC   | AVGVRTLHFSVK    |
| Maggril  | 87 | EN-----SSSHK   | PITV              | TISDRSIFQQTQRGFRAGL | QFKDDANTGGR    | CAVGVRTLHFSVK   |
| Conlus1  | 91 | DS----ADAAQYK  | PIEV              | NINNASVYQAYGFRRAGL  | LEFANDSNTGSL   | GYTGVKTLHFSVQ   |
| Diaamp1  | 83 | DN-----ASYKS   | LEV               | TISDESIFQKQYGFRRAGL | LEFANDINEGSL   | GYQGITLHFSVK    |
| Diahell  | 83 | DN-----ASYKS   | LEV               | TISDQSIFQKQNGFRAGL  | LEFANDPNEG     | SFGYQGITLHFSVR  |
| Micbo11  | 98 | DD-----PAKHK   | SFEV              | TINDRSIFKTOGFRRAGL  | LEKNDINAGPG    | NTGVKTLHFSVK    |

|          |     |                                                               |
|----------|-----|---------------------------------------------------------------|
| Fo1-EC14 | 143 | QDDKRPLNLSHEYLVNWHKADFSGNQFQFOAGQLIGQ-N--GTAATWKLLDQDFKLLWE   |
| Fuspro1  | 143 | QDDKRPLNLSHEYLVNWHKADFSGNQFQFOAGQLIGQ-N--GTAATWKLLDQDFKLLWE   |
| Fusman1  | 143 | QDDKRPLNLSHEYLVNWHKADFSGNQFQFOAGQLIGQ-N--GTAATWKLLDQDFKLLWE   |
| Fusfuj1  | 143 | QDDKRPLNLSHEYLVNWHKADFSGNQFQFOAGQLIGQ-N--GTAATWKLLDQDFKLLWE   |
| Fusnyg1  | 143 | QDDKRPLNLSHEYLVNWHKADFSGNQFQFOAGQLIGQ-N--GTAATWKLLDQDFKLLWE   |
| Fusver1  | 143 | QDDKRPLNLSHEYLVNWHKADFSGNQFQFOAGQLIGQ-N--GTAATWKLLDQDFKLLWE   |
| Fuscul1  | 140 | QDKSRPLNLSHEYLVNWHKADFSGNQFQFQSGTIIGQ-N--HTAATWKLFDEKMKLLWE   |
| Fusgra1  | 140 | QDKSRPLNLSHEYLVNWHKADFSGNQFQFQSGTIIGQ-N--HTAATWKLFDEKMKLLWE   |
| Fuspse1  | 140 | QDKSRPLNLSHEYLVNWHKADFSGNQFQFQSGTIIGQ-N--HTAATWKLFDEKMKLLWE   |
| Fuslan1  | 140 | QDKSRPLNLSHEYLVNWHKADYSGNQFQFOAGTIIGQ-N--HAASTWKLFDEKMKLLWE   |
| Fuspoa1  | 140 | QDKNRPLNLSHEYLVNWHKADYSGNQFQFOAGTIIGQ-N--HAAATWKLFDEKMKLLWE   |
| Fusven1  | 140 | QDKNRPLNLSHEYLVNWHKADFSGNQFQFOAGTIIGQ-G--HAAATWKLFDEKMKLLWE   |
| Neodit1  | 142 | QDESRLNLSHEYLVNWHKADYSGNQFNFOGTGAMIDOPT--LPKDTYKLLDRTNKEIWS   |
| Fussol1  | 143 | QDESRLNLSHEYLVNWHKADYSGNQFNFEAGTIIGQ-D--LPKDTWKLLDRTNKQIWS    |
| Colchl1  | 139 | QDPSRPLNLSHEYLVNWHKADYDANQFSFOAGTIFGQAG--FPKDTFKLLDRDNKLVWS   |
| Colfio1  | 148 | INSERPLNLSHEYLVNWHKADYDANQFNFOGTIIGQPR--LPKDTFKLLDRDNKLLWS    |
| Colnym1  | 148 | LDLERPLNLSHEYLVNWHKADYDANQFNFOGTIIGQPE--LPKDTYKLLDRDNKLLWS    |
| Colsim1  | 148 | LDLERPLNLSHEYLVNWHKADYDANQFNFOGTIIGQPA--LPKDTFKLLDRDNKLLWL    |
| Colglo1  | 135 | QDAERPLNLSHEYLVNWHKADYDANQFNFOGTIIGQSG--LPEDTFKLLDRDNRLVWS    |
| Colgra1  | 149 | QDAARPLNLSHEYLVNWHKADYDANQFNFOGTIIGREG--LPKDTFKLLDRDNKLLWS    |
| Colinc1  | 139 | QDAARPLNLSHEYLVNWHKADYDANQFNFOGTIIGQAG--LPKNTFKLLDRDNKLVWS    |
| Coltof1  | 139 | QDPARPLNLSHEYLVNWHKADYDANQFNFOGTIIGQAG--LPKNTFKLLDRDNKLVWS    |
| Colhig1  | 141 | QDAARPLNLSHEYLVNWHKADYDANQFSFOGTIIGQPG--LPKDTFKLLDRDNRLVWS    |
| Colorb1  | 135 | QDIERPLNLSHEYLVNWHKADYDANQFNFOGTIIGQEG--LPEKTWKLLDRDNKLVWS    |
| Veralf1  | 141 | TDAQRRFNESHEYLVNWHKADYDANQFNFOGTIIGQPE--LPANTWKLLDRDNKLLWS    |
| Verdah1  | 141 | TDAQRRFNESHEYLVNWHKADYDANQFNFOGTIIGQPE--LPANTWKLLDRDNKLLWS    |
| Verlon1  | 141 | TDAQRRFNESHEYLVNWHKADYDANQFNFOGTIIGQPE--LPANTWKLLDRDNKLLWS    |
| Lompro1  | 134 | TDPQRTLNLSHEYLVNWHKADYDANQFNFOGTIIGQTG--LPAETWKLLDRSNKQLWS    |
| Sceapi1  | 134 | TDPQRTLNLSHEYLVNWHKADYDANQFNFOGTIIGQTG--LPRDTYKLLDRDNKQLWS    |
| Chathe1  | 145 | WDNARPLNLSHEYLVNWHKADYSANQFNFEAGTIGQTQ--LPADTWKVLDRNRRQIWA    |
| Madmyc1  | 143 | WDAQRALNLSHEYLVNWHKADYSANQFNFOAGTIGQSS--LPRDTYKVLNRQNRQVWS    |
| Thiter1  | 141 | LDPQRPLNLSHEYLVNWHKADYSANQFNFEAGTIIGQSG--LPKNTWKVLNRQNRQIWS   |
| Thethe1  | 141 | IDPQRGLNLSHEYLVNWHKADYSANQFNFEAGTIIGQEG--LPKDTYKVLNRNRRQIWS   |
| Conlig1  | 135 | QDPKRPLNLSHEYLVNWHKADYSADQFMFEAGTIIDQTG--LPKNTFKVLNRQSKQIWS   |
| Daldsp1  | 134 | QDPERTLNLSHEYLVNWHKADYSANQFNFOGTIIGKSG--SDKNNFKILNRQNTQVWS    |
| Hyposp1  | 134 | QDPERALNLSHEYLVNWHKADYSANQFNFEAGTIIGKSG--SDKNSFKVLNRQNTQVWS   |
| Rosnec1  | 141 | QDPQRRNLNLSHEYLVNWHKADYSANQFNFOAGTIIGRNS---NKNTFKVLNRQNTQVWS  |
| Phamin1  | 133 | QDPARALNLSHEYLVNWHKADYSADQIMFEAGTIIGQTG--LPKNTFKFFDRNMKQLWS   |
| Spobra1  | 146 | QDAQRPLNLSHEYLVNWHKADYSADQIMFOAGTIIDQAG--LPKNTFKVMSRQNKQLWS   |
| Sposch1  | 146 | QDAQRPLNLSHEYLVNWHKADYSADQIMFOAGTIIDQAG--LPKNTFKVMSRQNKQLWS   |
| Spoins1  | 157 | QDAQRPLNLSHEYLVNWHKADYSADQIMFOGTIIDQAG--LPKNTWKVLNRTNKLWS     |
| Podans1  | 143 | WDAQRPLNLSHEYLVNWHKADYSANQFNFOAGTIGONS--LARDTWKVLNRQNRQVWS    |
| Neucra1  | 136 | QDEARGLNLSHEYLVNWHKADYSANQFNFEAGTIIGQEG--SLAKNTFKILMSRENKLIWS |
| Neutet1  | 136 | QDEARGLNLSHEYLVNWHKADYSANQFNFOGTIIGQEG--SLAKNTFKILMSRENKLIWS  |
| Sormac1  | 137 | QDLKRPLNLSHEYLVNWHKADYSANQFNFOGTIIGQDTRKLPKNTFKILMSRENKLIWQ   |
| Pesfic1  | 132 | QDPTRTLNLNLSHEYLVNWHKADYNGNQFNFEAGTIIDNSS--LDKNTFKITNRNSEVIWS |
| Psevex1  | 133 | QDSSRPLNLSHEYLVNWHKADYNGNQFNFOGTIIGQ-S--YAKDTFKILDRQNVLVWS    |
| Eutlat1  | 135 | QDPARTFNLSHEYLVNWHKADYNGNQFNFEAGTIIGRPG---NENTFKILDRQNTQVWS   |
| Gaetri1  | 135 | IDPGRALNLSHEYLVNWHKADYSANQFNFEAGTIIGQTS--LPRDTFKILNRQNRQIWS   |
| Magory1  | 144 | IDAARGLNLSHEYLVNWHKADYSANQFNFEAGTIIGQPE--LPKNTFKILDRNRRQIWS   |
| Maggr1   | 141 | IDPARGLNLSHEYLVNWHKADYSANQFNFEAGTIIGQPD--LPKNTFKILDRNRRQIWS   |
| Conlus1  | 147 | QDPQRALNLSHEYLVNWHKADYSADQIMFOAGSILAQPG--LARDTFKVLDRNSSLWS    |
| Diaamp1  | 136 | QDSARALNLSHEYLVNWHKADYSGDQFMFOGTGAMIDYPD--MPKNTFKFFDRNATLLWS  |
| Diahe1   | 136 | QDPALALNLSHEYLVNWHKADYSANQFSFOGTIIGMDHPE--LSADSFKFFDRDGRLLWS  |
| Micbo1   | 152 | QDPARPLNLSHEYLVNWHKADFSNHFETAGSLIGRPE--FPANTFKILNRKLDVIFS     |

|          |     |              |       |          |         |                                     |
|----------|-----|--------------|-------|----------|---------|-------------------------------------|
| Fo1-EC14 | 200 | TPMLKK-VWQNF | AITLN | YEKNT    | IQAYYS  | -KGCKPLKVAT-QPIARNLTGQGGQFQIGILKK   |
| Fuspro1  | 200 | TPMLKK-VWQNF | AITLN | YEKNT    | IQAYYS  | -KGCKPLKVAT-QPIARNLTGQGGQFQIGILKK   |
| Fusman1  | 200 | TPMLKK-VWQNF | AITLN | YEKNT    | IQAYYS  | -KGCKPLKVAT-QPIARNLTGQGGQFQIGILKK   |
| Fusfuj1  | 200 | TPMLKK-VWQNF | AITLN | YEKNT    | IQAYYS  | -KGCKPLNVAT-QPIARNLTGQGGQFQIGILKK   |
| Fusnyg1  | 200 | TPMLKK-VWQNF | AITLN | YEKNT    | IQAYYS  | -KGCKPLKAAT-QPIARNLTGQGGQFQIGILKK   |
| Fusver1  | 200 | TPMLKK-VWQNF | AITLN | YEKNT    | IQAYYS  | -KGCKPLKAAT-QPIARNLTGQGGQFQIGILKK   |
| Fuscul1  | 197 | TPMLEG-KWQNF | AITLN | NEDKN    | TIQAYYS | -EGPKALKAAT-QPIARDLSGGGGYQIGMLKK    |
| Fusgra1  | 197 | TPMLEG-KWQNF | AITLN | NEDKN    | TIQAYYS | -EGSKALKAAT-QPIARDLSGGGGYQIGMLKK    |
| Fuspse1  | 197 | TPMLEG-KWQNF | AITLN | NEDKN    | TIQAYYS | -EGSKALKAAT-QPIARDLSGGGGYQIGMLKK    |
| Fuslan1  | 197 | TPMLKG-KWQNF | AITLN | NEDKN    | TIQAYYS | -EGSKPLKAAT-KPIARDLSGGGGYQIGMLKK    |
| Fuspoa1  | 197 | TPMLKG-KWQNF | AITLN | NEDKN    | TIQAYYS | -EGSKPLKAAT-KPIARDLSGGGGYQIGMLKK    |
| Fusven1  | 197 | TPMLKA-KWQNF | AITLN | NEDKN    | TIQAYYS | -EGSKPLKAAT-KPIARDLSGGGGYQIGMLKK    |
| Neodit1  | 200 | TPILPG-SWQNF | AITL  | DFNNNT   | IQAYYS  | -EGNKPLLPAT-KPVANDNSGRGGYQIGILKK    |
| Fussol1  | 200 | TPILKD-VWQNF | AITL  | DFNNNT   | IQAYYS  | -EGRKPLRAVT-EPISENDNSGRGGYQIGILKK   |
| Colchl1  | 197 | TPIVTDGSWQNF | AITL  | DFSNT    | IQVWYS  | -AGDAPLTKQG-SIISANLAGEGGYQIGILKK    |
| Colfio1  | 206 | TPMAMDGSWQNF | AITL  | DFLYNT   | IQVWYS  | -AGDNPLARQG-GGVPVDLAGGGYQIGILKK     |
| Colnym1  | 206 | TPIAKDGSWQNF | AITL  | DFLNNT   | IQVWYS  | -AGNNPLARQG-GAVPVNLAGGGYQIGILKK     |
| Colsim1  | 206 | TPMAKDGSWQNF | AITL  | DFLNST   | IQVWYS  | -AGNNPLARQG-GAVPVNLAGGGYQIGILKK     |
| Colglo1  | 193 | TPMATDGSWQNF | AITL  | DFDQNT   | IQVWYS  | -ANDEPLQKSG-DIISANLAGGGYQIGMLKK     |
| Colgra1  | 208 | TPVATDGSWQNF | AITL  | DFSNT    | IQVWYS  | -TGGARLASQG-GAIPANLAGGGYQIGILKK     |
| Colinc1  | 197 | TPIATDGSWQNF | AITL  | DFSNT    | IQVWYS  | -AGDAPLVKQG-GVISANLTGDDGYQIGILKK    |
| Coltof1  | 197 | TPMATDGSWQNF | AITL  | DFSNT    | IQAYYS  | -AGDAPLIKQG-GVISANLAGGGYQIGILKK     |
| Colhig1  | 199 | TPVATDGSWQNF | AITL  | DFPNNT   | IQVWYS  | -AGNAPLARQG-GVIAANLLGDDGYQIGILKK    |
| Colorb1  | 193 | TPLVDDGSWQNF | AITL  | DFDQNT   | IQVWYS  | -GGGAPLTKQG-DGILADLAGGGYQIGILKK     |
| Veralf1  | 199 | TPVLDG-VWQNF | GITL  | DFNANT   | ISVLYS  | -EGDKPLAPSGKGAFPANLAGGGYQIGILKK     |
| Verdah1  | 199 | TPVVDG-VWQNF | GITL  | DFNANT   | ISVLYS  | -EGDKPLAPSGKGAFPANLAGGGYQIGILKK     |
| Verlon1  | 199 | TPVLDG-VWQNF | GITL  | DFNANT   | ISVLYS  | -EGDKPLAPSGKGSFPANLAGGGYQIGILKK     |
| Lompro1  | 192 | TPIKDD-TWQNF | AITL  | DMTANT   | IQVWYS  | -EGDAELAKAT-DPINNNNAGEGGYQVGMMLKK   |
| Sceapi1  | 192 | TPIKSD-TWQNF | GITL  | DMTGNT   | IQVWYS  | -EGDEELAKAT-DPINNNNAGEGGYQVGMMLKK   |
| Chathe1  | 203 | VKIERE-GWQNF | AITL  | DEKNT    | IQVWYS  | -KDDEPLTAVT-SAVYNNNAGEGGYQIGILKK    |
| Madmyc1  | 201 | TPILRD-DWQNF | AITL  | DFNNT    | IQVWYS  | -EGDEPLRSVT-SAVSNNNAGEGGYQIGILKK    |
| Thiter1  | 199 | TPIVKD-DWQNF | AITL  | DFNKNT   | IQVWYS  | -QGTDPKRSVT-SAVSNDNSGEGGYQIGILKK    |
| Thethe1  | 199 | TPILED-QWQNF | AITL  | DFNQNT   | IQVWYS  | -EADPLESVT-DVVSNNNAGEGGYQIGILKK     |
| Conlig1  | 193 | TPUEST-AWQNF | AITL  | DFNKNT   | IQVWYS  | -KGDDPLKSVT-SAVSNDNSGGGGYQIGILKK    |
| Daldsp1  | 192 | TPIDAT-AWQNF | AITL  | DFVKNT   | IQVWYS  | -KDDEPLKAVT-EALQNDNSGGGGYQIGILKK    |
| Hyposp1  | 192 | TPIDAT-AWQNF | AITL  | DFVKNT   | IQVWYS  | -KDDEPLKAVT-SALQNDNSGGGGYQIGILKK    |
| Rosnec1  | 198 | TPIDET-AWQNF | AITL  | DFNKNT   | IQVWYS  | -RGDEPLRSVT-SALSNNNAGGGGYQIGILKK    |
| Phamin1  | 191 | TAVDGT-AWQNF | AVTL  | DNINSNT  | IQVWYS  | -KDDEPLKSVT-SAVSADLSGGGGYQIGILKK    |
| Spobra1  | 204 | TPISTT-DWQNF | AVTL  | DFNKNT   | IQVWYS  | -KGTDPPLASVL-KATADDLSGAGGFQIGILKK   |
| Sposch1  | 204 | TPISTT-DWQNF | AVTL  | DFNKNT   | IQVWYS  | -KGTDPPLASVL-KATADDLSGAGGFQIGILKK   |
| Spoins1  | 215 | TPLVAA-DWQNF | AVTL  | DFNKNT   | IQVWYS  | -QGSDDLKSVL-TATADDLIGAGEYQIGILKK    |
| Podans1  | 201 | TPILRN-EWQNF | AVTL  | DFVNT    | IRVWYS  | -RGSEPLRSVT-NALTNNNAGEGGYQIGILKK    |
| Neucra1  | 195 | TPIEQK-EWQNF | AVTL  | DFNKNT   | IRVWYS  | -KGHEPLRSVT-QAVPNNNAGEGGYQIGILKK    |
| Neutet1  | 195 | MPIEQK-EWQNF | AVTL  | DFDKNT   | IRVWYS  | -KGHEPLRSVI-QAVPNNNAGEGGYQIGILKK    |
| Sormac1  | 197 | TPIEKK-EWQNF | AVTL  | DFNKNT   | IQVWYS  | -KGNEPLRSVT-KAVPNNNAGEGGYQIGILKK    |
| Pesfic1  | 190 | TPIDQS-AWQNF | AVTL  | DFNNT    | IQVWYS  | -LGTPELTAVT-QALANDNSGGYQFQIGILKK    |
| Psevex1  | 190 | TPIDAT-AWQNF | AVTL  | DFDKNT   | IQVWYS  | -EGDAALAAVT-NVLTNDNSGEGGYQFQIGILKK  |
| Eutlat1  | 190 | TPIDES-EWQNF | AVTL  | DFEQNT   | IQVWYS  | -VGDTPLEAVT-EALSNNNAGEGGYQIGILKK    |
| Gaetri1  | 193 | TKVDNT-AWQNF | AVTL  | DKNT     | IQVWYS  | -KGDEPLKSVT-NAVQNDNSGKGQYQLGLLKK    |
| Magory1  | 202 | TPIDET-AWQNF | AVTL  | DFVKNT   | IRVWYS  | -KNDEPLKAASCAPTNDNSGEGGYQLGLLKK     |
| Maggr1   | 199 | TPIDET-AWQNF | AVTL  | DFDKNT   | IRVWYS  | -KNDEPLKAASCTASPNDNSGEGGYQLGLLKK    |
| Conlus1  | 205 | VAMDLEGGWQNF | AVTL  | DVTANT   | IQAYYS  | -TGTDPQLQAVT-DVTPDLSGGGGYQIGIMIKK   |
| Diaamp1  | 194 | TPIDFS-EWQNF | AVTL  | DIDSNL   | IQAYYS  | -LGNAALEAVT-DFVPADLSGEGGYQIGILKK    |
| Diahe1   | 194 | TPIDFE-EWQNF | AVTL  | MLNVDANL | IQAYYS  | -LGDAALEAVT-DAEPLRLEGGGYQIGILKK     |
| Micbo1   | 210 | TPINLRGEWQNF | AVTL  | DMNANT   | IQVWYS  | -SPNANTPLKPAFPPTPLPNDNSGGYQFQIGILKK |



|          |     |                                           |
|----------|-----|-------------------------------------------|
| Fol-EC14 | 257 | PTG-TDDVANSGFQEANLNEGLIYGGIFLED-SADGCVSL  |
| Fuspro1  | 257 | PTG-TDDVANSGFQEANLNEGLIYGGIFLED-SADGCVSL  |
| Fusman1  | 257 | PTG-TDDVANSGFQEANLNEGLIYGGIFLED-SADGCVSL  |
| Fusfuj1  | 257 | PTG-TDDVANAGFQEANLNEGLIYGGIFLED-SADGCVSL  |
| Fusnyg1  | 257 | PTG-TDDVANSGFQEANLNEGLIYGGIFLED-SADGCVSL  |
| Fusver1  | 257 | PTG-TDDVANSGFQEANLNEGLIYGGIFLED-SADGCVSL  |
| Fuscul1  | 254 | PTG-TDDVANAGFQEANLNEGLIYGGIFLED-SKNNCVSL  |
| Fusgra1  | 254 | PTG-TDDVANAGFQEANLNEGLIYGGIFLED-SKNNCVSL  |
| Fuspse1  | 254 | PTG-TDDVANAGFQEANLNEGLIYGGIFLED-SKNNCVSL  |
| Fuslan1  | 254 | PTG-TDDVANAGFQEDNLNEGLIYGGIFLED-SKNDCVSL  |
| Fuspoa1  | 254 | PTG-TDDVANAGFQENNNEGLIYGGIFLED-SKNDCVSL   |
| Fusven1  | 254 | PTG-TDDVANAGFQEDNLDEGLIYGGIFLED-SKNDCVSL  |
| Neodit1  | 257 | PTG-TADVNSGFQESGLNEGLIYGGIFLED-STNYCVSK   |
| Fussol1  | 257 | PTG-TDDVNSGFQESDLDEGLIYGGIFLED-SKDGCVSA   |
| Colchl1  | 255 | PTG-TSDVVNSGYQSSNLDEGQIYGGIFLED-SADGCVSI  |
| Colfio1  | 264 | PTG-TDDVVNSGYQSSNLNEGLIYGGIFLED-SADGCVSI  |
| Colnym1  | 264 | PTG-TDDVVNSGYQSSNLNEGLIYGGIFLED-SANGCVSI  |
| Colsim1  | 264 | PTG-TDDVVNSGYQSSNLNEGLIYGGIFLED-SANGCVSI  |
| Colglo1  | 251 | PTG-TDDVVNSGYQESDLDEGQIYGGIFLED-SADGCVSV  |
| Colgra1  | 266 | PTG-TSDVVNSGYQSSNLDEGQIYGGIFLED-GADGCVSL  |
| Colinc1  | 255 | PTG-TSDVVNSGYQSSNLNEGQIYGGIFLED-SADGCVST  |
| Coltof1  | 255 | PTG-TSDVVNAGYQSSNLNEGQIYGGIFLED-STNGCVST  |
| Colhig1  | 257 | PTG-TSDVVNEGYQSSNLDEGQIYGGIFLED-SAGGCVST  |
| Colorb1  | 251 | PTG-TSDVVNSGYQASNLDEGQIYGGIFLED-STGGCVSI  |
| Veralf1  | 257 | PTG-TDDVVNSGFQESPLNEGLIYAGVFLED-SANGCVSK  |
| Verdah1  | 257 | PTG-TDDVVNSGFQESPLNEGLIYAGVFLED-SANGCVSK  |
| Verlon1  | 257 | PTG-TDDVVNSGFQESPLNEGLIYAGVFLED-SANGCVSK  |
| Lompro1  | 249 | PTG-TSDVVNSGYQESGLDEGLIYGGIFLED-SASDCVSK  |
| Sceapi1  | 249 | PTG-TSDVVNSGYQESGLDEGLIYGGIFLEDSSADTCVSK  |
| Chathe1  | 260 | PTG-TSDVVNSGYQSPNLDEGLIYGGIFLED-SAGGCVSL  |
| Madmyc1  | 258 | PTG-TSDVVNSGYQESNLNEGLIYGSIFVED-SADGCTSL  |
| Thiter1  | 256 | PTG-TSDVVNSGYQESNLNEGLIYGSIFVED-SANGCTSL  |
| Thethe1  | 256 | PTG-TDDVVNSGYQESGLDEGLIYGSIFVED-SANGCVSL  |
| Conlig1  | 250 | PTG-TSDVVNAGYQESKLNDEGQIYGGIFLED-STNGCVSL |
| Daldsp1  | 249 | PTG-TSDVVNSGYQETGLNEGQIYGGIFLED-SANGCTSL  |
| Hyposp1  | 249 | PTG-TSDVVNSGYQETGLSEGQIYGGIFLED-SANGCVSL  |
| Rosnec1  | 255 | PTG-TSDVVNCGYQEKNLDEGQIYGGIFLED-GANGCTSL  |
| Phamin1  | 248 | PTG-TSDVVNSGYQESGLNEGQIYGGIFLED-SSNGCTSL  |
| Spobra1  | 261 | PTG-TSDVVNSGFQESGLKEGQIYGGIFLED-SANGCTSL  |
| Sposch1  | 261 | PTG-TSDVVNSGFQESGLKEGQIYGGIFLED-SANGCTSL  |
| Spoins1  | 272 | PTG-TSDVVNSGFQESGLKEGLIYGGIFLED-SANGCVSL  |
| Podans1  | 258 | PTG-TSDVVNSGYHQRNLNEGLIYGSIFVED-GEggCVSL  |
| Neucra1  | 252 | PTG-TDDVVNSGYQESDLDEGQIYGGIFLED-SANGCVSL  |
| Neutet1  | 252 | PTG-TDDVVNSGYQESGLDEGQIYGGIFLED-SANGCVSL  |
| Sormac1  | 254 | PTG-TDDVVNKGYQESGLDEGQIYGGIFLED-SAGGCVSL  |
| Pesfic1  | 247 | PTG-TSDVVNSGYQESPLSEGQIYGGIFLED-SANGCTTL  |
| Psevex1  | 247 | PTG-TSDVVNSGYQEKGLLEGQIYGGIFLED-SADGCTSL  |
| Eutlat1  | 247 | PTG-TDDVVNSGYQETGLDEGQIYGSIFLED-SSDGCVSL  |
| Gaetri1  | 250 | PTG-TNDVVNSGYQSRNLNEGLIYGGIFLED-SAGGCTSL  |
| Magory1  | 260 | PTG-TDDVVNSGYQASGLDEGLIYGGIFLED-SADGCVSL  |
| Maggr1   | 257 | PTG-TDDVVNSGYQASGLDEGLIYGGIFLED-SADGCVSL  |
| Conlus1  | 263 | PTG-TSDVVNAGYQEAFFEGQIYGGIFLED-SAGGCTSL   |
| Diaamp1  | 251 | PTG-TDDVVNSGFQESPLNEGQIYGGIFLED-STGGCVSL  |
| Diahe1   | 251 | PTG-SADVNSGFQESPLNEGQIYGGIFLED-STAGCVSL   |
| Micbo1   | 270 | PTGETTDDIVNKGHQSAGLDEGQIYGGIFLED-SAGGCVSL |

## **Sordariomycetes**

### **Hypocreomycetidae - Glomerellales**

Colchl1 = OLN97223.1 hypothetical protein CCHL11\_02057 [Colletotrichum chlorophyti] after splicing out intron with putative non-canonical GCGCGT donor site, consistent with the findings of Rep et al. (2006)

Colfio1 = EXF74738.1 hypothetical protein CFIO01\_05408 [Colletotrichum fioriniae PJ7]

Colglo1 = EQB57524.1 hypothetical protein CGLO\_02337 [Colletotrichum gloeosporioides Cg-14]

Colgra1 = XP\_008095341.1 hypothetical protein GLRG\_06465 [Colletotrichum graminicola M1.001]

Colhig1 = XP\_018153158.1 hypothetical protein CH63R\_11343 [Colletotrichum higginsianum IMI 349063]

Colinc = KZL79130.1 hypothetical protein CI238\_10245 [Colletotrichum incanum]  
Colnym = KXH49624.1 hypothetical protein CNYM01\_07617 [Colletotrichum nymphaeae SA-01]  
Colorb = TDZ26553.1 hypothetical protein Cob\_v001237 [Colletotrichum orbiculare MAFF 240422]  
Colsim = KXH49371.1 hypothetical protein CSIM01\_11916 [Colletotrichum simmondsii]  
Coltof = KZL70738.1 hypothetical protein CT0861\_13067 [Colletotrichum tofieldiae]  
Veralf = XP\_003005433.1 conserved hypothetical protein [Verticillium alfalfae VaMs.102]  
Verdah = XP\_009658131.1 uncharacterized protein VDAG\_10367 [Verticillium dahliae VdLs.17]  
Verlon = KAG7105666.1 hypothetical protein HYQ44\_015124 [Verticillium longisporum]

**Hypocreomycetidae - Hypocreales - Clavicipitaceae - none**  
**Hypocreomycetidae - Hypocreales - Cordycipitaceae - none**  
**Hypocreomycetidae - Hypocreales - Hypocreaceae - none**  
**Hypocreomycetidae - Hypocreales - Nectriaceae**  
Fuspro = XP\_031082440.1 related to endoglucanase c [Fusarium proliferatum ET1]  
Fusfuj = KLO84549.1 endoglucanase c [Fusarium fujikuroi]  
Fusman = XP\_041680198.1 uncharacterized protein FMAN\_08678 [Fusarium mangiferae]  
Fuscul = PTD05001.1 hypothetical protein FCULG\_00002645 [Fusarium culmorum]  
Fusgra = XP\_011319797.1 hypothetical protein FGSG\_08907 [Fusarium graminearum PH-1]  
Fuslan = KPA46823.1 endoglucanase c [Fusarium langsethiae]  
Fusnyg = PNP82107.1 hypothetical protein FNYG\_04560 [Fusarium nygamai]  
Fuspoa = KAG8671804.1 hypothetical protein FPOAC1\_005062 [Fusarium poae]  
Fuspse = KAF0636074.1 hypothetical protein FPSE5266\_08205 [Fusarium pseudograminearum]  
Fusven = XP\_025584865.1 uncharacterized protein FVRRES\_05581 [Fusarium venenatum]  
Fusver = XP\_018746004.1 hypothetical protein FVEG\_02506 [Fusarium verticillioides 7600]  
Neodit = KPM34483.1 hypothetical protein AK830\_g12087 [Neonectria ditissima]  
Fussol = XP\_003052800.1 uncharacterized protein NECHADRAFT\_67676 [Fusarium vanettenii 77-13-4] (syn. Fusarium solani)

**Hypocreomycetidae - Hypocreales - Ophiocordycipitaceae - none**  
**Hypocreomycetidae - Hypocreales - Stachybotryaceae - none**  
**Hypocreomycetidae - Microascales**  
Ceratocystis platani - no orthologue  
Thielaviopsis punctulate - no orthologue  
Lompro = PKS06492.1 hypothetical protein jhhlp\_007240 [Lomentospora prolificans]  
Sceapi = XP\_016644335.1 hypothetical protein SAPIO\_CDS3558 [Scedosporium apiospermum]

**Sordariomycetidae - Coniochaetales**  
Conlig = OIW34589.1 hypothetical protein CONLIGDRAFT\_650979 [Coniochaeta ligniaria NRRL 30616]

**Sordariomycetidae - Togniniales**  
Phamin = XP\_007912622.1 hypothetical protein UCRPA7\_1852 [Phaeoacremonium minimum UCRPA7]

**Sordariomycetidae - Diaporthales**  
Conlus = PSR86977.1 hypothetical protein BD289DRAFT\_433121 [Coniella lustricola]  
Diaamp = KKY30718.1 hypothetical protein UCDDA912\_g09348 [Diaporthe ampelina]  
Diahel = POS74193.1 hypothetical protein DHEL01\_v207411 [Diaporthe helianthi]

**Sordariomycetidae - Magnaporthales**  
Gaetri = XP\_009230278.1 hypothetical protein GGTG\_14087 [Gaeumannomyces tritici R3-111a-1]  
Magory = ELQ60567.1 hypothetical protein OOW\_P131scaffold01278g3 [Pyricularia oryzae P131] (syn. Magnaporthe oryzae)  
Maggri = XP\_030977943.1 uncharacterized protein PgNI\_09303 [Pyricularia grisea] (syn. Magnaporthe grisea)

**Sordariomycetidae - Ophiostomataceae**  
Grosmania clavigera - no orthologue  
Ophiostoma piceae - no orthologue  
Spobra = XP\_040622012.1 uncharacterized protein SPBR\_06066 [Sporothrix brasiliensis 5110]  
Spoins = OAA67127.1 hypothetical protein SPI\_01703 [Sporothrix insectorum RCEF 264]  
Sposch = XP\_016586072.1 hypothetical protein SPSK\_04444 [Sporothrix schenckii 1099-18]

**Sordariomycetidae - Sordariales - Sordariales incertae sedis**  
Madmyc = KXX74097.1 hypothetical protein MMYC01\_208909 [Madurella mycetomatis]

**Sordariomycetidae - Sordariales - Chaetomiaceae**  
Chathe = XP\_006697564.1 hypothetical protein CHTH\_0073070 [Chaetomium thermophilum var. thermophilum DSM 1495]  
Podans = XP\_001913072.1 uncharacterized protein PODANS\_1\_8450 [Podospira anserina S mat+] with intron prediction corrected  
Thethe = XP\_003659079.1 uncharacterized protein MYCTH\_2295704 [Thermothelomyces thermophilus ATCC 42464]  
Thiter = XP\_003652516.1 uncharacterized protein THITE\_2114094 [Thermothielavioides terrestris NRRL 8126] (syn. Thielavia terrestris)

### **Sordariomycetidae - Sordariales - Sordariaceae**

Neucra = KHE89943.1 glycoside hydrolase family 131 protein [*Neurospora crassa*] after splicing out intron with non-canonical GCATGT donor site described by Rep et al. (2006) and removing spurious N-terminal sequence preceding correct start methionine

Neutet = EGZ77998.1 hypothetical protein NEUTE2DRAFT\_80122 [*Neurospora tetrasperma* FGSC 2509] after splicing out intron with non-canonical GCATGT donor site described by Rep et al. (2006) and removing spurious N-terminal sequence preceding correct start methionine

Sormac = XP\_024511214.1 uncharacterized protein SMAC\_05957 [*Sordaria macrospora* k-hell]

### **Xylariomycetidae - Xylariales**

Eutlat = EMR68142.1 hypothetical protein UCREL1\_4850 [*Eutypa lata* UCREL1]

Daldsp = OTB14174.1 hypothetical protein K445DRAFT\_140233 [*Daldinia* sp. EC12]

Hyposp = OTA63122.1 glycoside hydrolase family 131 protein [*Hypoxyton* sp. EC38]

Micbol = KXJ85933.1 hypothetical protein Micbo1qcDRAFT\_220044 [*Microdochium bolleyi*]

Pesfic = XP\_007828005.1 hypothetical protein PFICI\_01233 [*Pestalotiopsis fici* W106-1]

Psevex = XP\_040712670.1 uncharacterized protein BCR38DRAFT\_398434 [*Pseudomassariella vexata*]

Rosnec = GAP92008.2 putative glycoside hydrolase family 131 protein [*Rosellinia necatrix*] corrected to remove spurious N-terminal sequence

**Supplementary Figure S6. Fol-EC14 alignment.** Multiple protein-sequence alignment of Fol-EC14 orthologues in the Fol-EC14 clade of Sordariomycete GH131 (glycosyl-hydrolase 131) sequences. All sequences shown were the highest blastP matches to Fol-EC14 obtained for each genome-sequenced species represented. Sequences were aligned using ClustalW at <https://www.ebi.ac.uk/Tools/msa/mafft/>. Amino-acid identities were highlighted in black and similarities in grey using BoxShade at [https://embnet.vital-it.ch/software/BOX\\_form.html](https://embnet.vital-it.ch/software/BOX_form.html). Conserved cysteines have been highlighted manually in blue, residues conserved with the catalytic residues of PaGluc131A and CcGH131A in red and non-conserved residues in teal.
