# Supplementary material for: Transcriptome Analysis of Fusarium–Tomato Interaction Based on an Updated Genome Annotation of Fusarium oxysporum f. sp. lycopersici Identifies Novel Effector Candidates That Suppress or Induce Cell Death in Nicotiana benthamiana
Source: MDPI journal article supplement (doi:10.3390/jof8070672), 2022-06-26
Supplement: s1 [file s1]

|         |   |                       |                                             |                    |
|---------|---|-----------------------|---------------------------------------------|--------------------|
| Colhig2 | 1 | MYTSTLIL--SLVAAAAA    | ACTGG--KNKTAE--AAAPGAKA--CCALQFDGRIPKAF     | TAAD               |
| Colch12 | 1 | MFTSTLFL--SLVAAAAA    | ACNGK--PNDT---DSSSGVKC--CCALQFDGRIPKAF      | TAAD               |
| Colfio2 | 1 | MFASTIFL--SLVAAAAA    | ACDGTTPKNNTG---AVSPGAKA--CCALQFDGRIPKTFKAAD |                    |
| Colsim2 | 1 | MFASTIFL--SLVAAAAA    | ACDGTTPKNNTG---AVSPGAKA--CCALQFDGRIPKTFKAAD |                    |
| Colinc2 | 1 | MFTSTLFL--SLVAAAAA    | ACDGST-KNNTA---GATPGAKA--CCSLQFDGRIPKAF     | TAAD               |
| Coltof2 | 1 | MFTSTLFL--SLVAAAAA    | ACDGST-KNNTA---GATPGAKA--CCSLQFDGRIPKAF     | TAAD               |
| Colgra2 | 1 | MYTSTLIF--SLLAAA----- | -----GAKAQCTLQFDGRIPKAS                     | TVAD               |
| Colorb2 | 1 | MFASTIIL--SLVAAVAAD   | CGSKS-GNNSYSSGPALPGAQA--CTLQFDGRIPKAF       | TAAD               |
| Lompro2 | 1 | MALSR-----ALLSILL     | SAA-----PLVSAQECTLQFDGRVPDGF                | AAAD               |
| Sceapi2 | 1 | MSPRS-----ALLSLILL    | SAL-----PLVSAQECTLQFDGRIPDGF                | AAAD               |
| Rosnec2 | 1 | MAGFYPL--ALLVGI       | IPTL-----VVSQCCDLQFDGRVP                    | SDFVAAT            |
| Conlig2 | 1 | MASPYLLSVSSIL         | TLLALTS-----AQKCP                           | LQFDGRIPSTFTPTS    |
| Grocla2 | 1 | MLARH-----SLVLLAS     | ATT-----AVLAKTCALQFDGRVP                    | STENLTT            |
| Ophpic2 | 1 | MISQYL-----SLLAL      | PVLAA-----AQKCSLQFDGRIPSNL                  | TLAA               |
| Spobra2 | 1 | MMYPLSI---AFLAL       | PLLAS-----AQKCTLQFDGRVP                     | STFTAAS            |
| Spoins2 | 1 | MRSSASL---ALLAL       | PLLAS-----AQKCATLQFDGRIP                    | SSFAAT             |
| Phamin2 | 1 | MASLIRNY-FSLLP        | ILLELS-----VVLAQSCDLQFDGRVP                 | SAGSAVAD           |
| Podans2 | 1 | MHKHGI---PLL          | FASLVTS-----VSAQSCRLHFDGRVP                 | PSFGVAG            |
| Diaamp2 | 1 | MFSQRLLT-QTTLV        | SLASLA-----ASC                              | SATLQFDGRVPAGTQLSA |
| Diahel2 | 1 | MFSQRLLT-QTSLF        | SLASLA-----ASC                              | STLQFDGRVPAGTQLSA  |
| Psevex2 | 1 | MASHRSFI-PSFLS        | LVTLVV-----AQOCTLQFDGRVP                    | SDFVAAT            |
| Thiter2 | 1 | MVHLQYY--SVAVS        | LLPS-----WVAAQNCTLQFDGRVP                   | SDLVAAD            |
| Gaetri2 | 1 | MRYSFTST-LSLALS       | SPIS-----GVWAAQCRKLQFDGRIP                  | NNFQVAQ            |
| Magory2 | 1 | MRSFTVAS--AIFG        | GLLATS-----PVYGOQCKLQFDGRVP                 | PANFOPAN           |
| Maggr2  | 1 | MRSFTVAS--AILG        | GLSATS-----PVYGOQCKLQFDGRIP                 | ENFELTG            |
| Cerpla2 | 1 | MQSL-----SLLALI       | APVA-----AQVCQLAFDGRVP                      | AKDFALEG           |
| Thipun2 | 1 | MYSR-----SLTAA        | AALAAA-----PAVAQVCPLAFDGRVP                 | DNFTLDT            |
| Colglo2 | 1 | MSLSFIST-LSLL         | LSAAGAAN-----AAKCP                          | LQFDGRVP           |
| Colnym2 | 1 | MHFSSSSL-GALV         | AVAAGAAD-----AAKCP                          | LQFDGRIP           |
| Stacha2 | 1 | MAPSLFRL-LPVL         | AGVTAVA-----CQSCPLQFDGRIP                   | RNFTVAD            |
| Stach12 | 1 | MAPSLFRI-LPVL         | AGVTAVA-----CQSCSLQFDGRIP                   | RNFTVAD            |
| Clapur2 | 1 | MRTYFAI---NFV         | AVATAAASG-----LGREAATTTKCP                  | LMFVDFGRVP         |

|         |    |           |                 |                             |                   |
|---------|----|-----------|-----------------|-----------------------------|-------------------|
| Colhig2 | 54 | FDG-KTSP  | FNTANVFGKGLKFS  | DLIK-LPGGQ---SL--FDV--NSTQ  | PFEVTI-----       |
| Colch12 | 52 | FDG-KSSP  | FNTANVFGKGLKFS  | DLIK-LPGGQ---SL--FDV--NSTQ  | PFEVTI-----       |
| Colfio2 | 55 | FDS-TSSP  | FNTANVFGKGLKFSE | IVQ-LPGGN---SL--FDV--NSTQ   | PFEVTI-----       |
| Colsim2 | 55 | FDS-TSSP  | FNTANVFGKGLKFSE | IVQ-LPGGN---SL--FDV--NSTQ   | PFEVTI-----       |
| Colinc2 | 54 | FDG-SSSP  | FNTANVFGKGLKFS  | DLVQ-LPGGQ---SL--FDV--NSTQ  | PFEVTI-----       |
| Coltof2 | 54 | FDG-TSSP  | FNTANVFGKGLKFS  | DLVQ-LPGGQ---SL--FDV--NSTQ  | PFEVTI-----       |
| Colgra2 | 38 | FDA-KTSP  | FNPSNVFGQGLKFS  | QLIQ-LPGGQ---SL--FDA--NATQ  | PFEVTI-----       |
| Colorb2 | 57 | FDG-KTSP  | FNADNVLGKGLKFSE | DLIK-LPEET---SL--FDG--NS    | SKPFEVTI-----     |
| Lompro2 | 41 | FDG-ANDI  | FSPDNVFGQGLSFG  | QLIQ-LPNAGL---SL--FDD--GT   | IPFEVTI-----      |
| Sceapi2 | 40 | FDQ-ANNI  | FSPDNVFGQGLAFS  | QLIQ-LPAIGA---SL--FDD--ATV  | PFEVTI-----       |
| Rosnec2 | 40 | FNT-GNGV  | EDNNVVGQGLSLGS  | VVQ-LQDSLS---SL--FDV--GTN   | PFEVTI-----       |
| Conlig2 | 41 | FDA-ANAF  | FQSNNVLGQGLKFS  | QLIQ-LPSITP---SL--FDT--ATV  | PVGVTI-----       |
| Grocla2 | 39 | FDT-ANGV  | FNPNNVFGKNLTLS  | QLLR-LPAQKG---SL--FDE--NTV  | PFEVTI-----       |
| Ophpic2 | 37 | FDS-NNNI  | YNPSNVFGKGLKFSE | LLIQ-LPAVAG---SL--FDT--KT   | VPFEVTI-----      |
| Spobra2 | 38 | FDT-NNNL  | FNPSNVFGQGLKFS  | QLIQ-LPAVTG---SL--FDV--NTV  | PAEVTI-----       |
| Spoins2 | 38 | FDT-NNNV  | FSPSNVFGQNLKLS  | QLVE-LPAQTG---SL--FDV--DTV  | PFEVTI-----       |
| Phamin2 | 43 | FDA-TNNL  | FSTDNVFGQGLKFS  | QLIE-LPAVTP---SLPKFDV--NTI  | PFEVTI-----       |
| Podans2 | 39 | FDT-PNNF  | FSETNVLGAGLSFS  | QLIQ-LPAISA---SL--FDT--ETI  | PFEVTI-----       |
| Diaamp2 | 40 | FDS-ENGL  | FNPDNVFGKNLTF   | SQLIQ-LPDVAP---SL--FDV--GTV | PFEVTI-----       |
| Diahel2 | 40 | FDS-DNGL  | FNPDNVFGKNVSE   | QLIQ-LPDVDP---SL--FDV--GTV  | PFEVTI-----       |
| Psevex2 | 40 | FDTAANT   | MFNPDFTFGANLS   | ISDVVE-MPCVTS---SL--FDAKN   | NATKAVEVTI-----   |
| Thiter2 | 41 | FDS-PNKFF | SEKFVLGQGLKFDQ  | ALRVLPVAGG---SL--FDI--DVDA  | QPVVLI-----       |
| Gaetri2 | 43 | FDA-ANNI  | FNPKNVLGKDLAFS  | KILQ-LPKTSG---SL--FDN--NGT  | QPLEVTI-----      |
| Magory2 | 42 | FDT-ANNI  | FNPSNVLGKGLKFSD | VIO-LPTLAQQ---SL--FDV--AGK  | TKAVEVTI-----     |
| Maggr2  | 42 | FDS-SNNL  | FSSSNVLGKGLKFSE | LLIQ-FPANGNQTKIL--FD        | TAGTKPFEVTIKYFTPP |
| Cerpla2 | 35 | FDA-DTSP  | FNPSNVFGKGLKSE  | ILIK-FPEGNG---GL--FDV--DTK  | PFEVTI-----       |
| Thipun2 | 38 | FDS-NNGV  | FNPSFVLGANLT    | WSEELQ-LPGGS---SL--FSD--NTQ | PFEVTI-----       |
| Colglo2 | 42 | FDT-SASP  | FNNGFVFGKGLKAS  | DVVT-IPTGLN---SL--FDA--NF   | SKPFEVNI-----     |
| Colnym2 | 41 | FDT-SASP  | FNNGFVFGKGLKAS  | DVVT-IPTGLS---SL--LDG--PANK | PFOVNI-----       |
| Stacha2 | 40 | FDT-QNGI  | YNPDFVKGRDLAFS  | DIIE-LETDA---TL--FDT--NSV   | PFTVQI-----       |
| Stach12 | 40 | FDT-QNGI  | YNPDFVKGRDLAFS  | DIIE-LETDT---TL--FDT--NSV   | PFTVQI-----       |
| Clapur2 | 47 | FDV-KNNV  | FNPSFVVGANQTF   | SSVLR-FDNRGTSH--SL--FDR     | VGVTKPFEVTI-----  |

|         |     |     |                      |        |        |         |         |         |         |         |
|---------|-----|-----|----------------------|--------|--------|---------|---------|---------|---------|---------|
| Colhig2 | 99  | --- | DDKSIFAPSADNVQIGFRR  | AEMLP  | LSNDGK | DASTQG  | IKTLHFS | LQKDD   | KRPLNLS | SHE     |
| Colchl2 | 97  | --- | NDKSIFAPSETNVQVGFRRA | ELLP   | LSNDGQ | DASTDG  | IKTLHFS | LKKDP   | QRPLNLS | SHE     |
| Colfio2 | 100 | --- | NDKSIFAPSETNVQVGFRRA | ELLP   | LSNDGK | DASTQG  | IKTLHFS | LQKDA   | QRPLNLS | SHE     |
| Colsim2 | 100 | --- | NDKSIFAPSETNVQVGFRRA | ELLP   | LSNDGK | DASTQG  | IKTLHFS | LQKDA   | QRPLNLS | SHE     |
| Colinc2 | 99  | --- | NDKSIFAPSETNVQVGFRRA | ELLP   | LSNDGK | DASTQG  | IKTLHFS | LQKDA   | QRPLNLS | SHE     |
| Coltof2 | 99  | --- | NDKSIFAPSATNVQVGFRRA | ELLP   | LSNDGK | DASTQG  | IKTLHFS | LQKDA   | QRPLNLS | SHE     |
| Colgra2 | 83  | --- | NDKSIFAPSANNVQIGFRR  | AELP   | ASNDGT | DPSTDG  | IKTLHFS | LMKDA   | QRSLNLS | SHE     |
| Colorb2 | 102 | --- | NDKSIFAPSETNVQVGFRRA | ELLP   | LSNDGK | DDSTVG  | IKTLHFS | LKKDD   | QRPLNLS | SHE     |
| Lompro2 | 86  | --- | SDDSIFAPSADNVQIGFRR  | AELLP  | ASNDGT | DPSTTG  | IKTLHFS | LMKDN   | ARFNL   | SHE     |
| Sceapi2 | 85  | --- | SDDSIFAPSADNVQIGFRR  | AELLP  | ASNDGT | DPSTTG  | IKTLHFS | LMKDN   | ARAFNL  | SHE     |
| Rosnec2 | 85  | --- | SDDSIFAPSADNVQIGFRR  | AELLP  | ASNDGT | DASTTG  | IKTLHFS | LMKDT   | NRPLNL  | THE     |
| Conlig2 | 86  | --- | SDKSIFAPSADNVQIGFRR  | AELLP  | ASNSGT | DASTAG  | IKTLHFS | VMKD    | ARPLNLS | SHE     |
| Groc1a2 | 84  | --- | SDESIFAPSASNVQIGFRR  | AELP   | ASNSGT | DPSTTG  | IKTLHFS | LMKDS   | ERPLNLS | SHE     |
| Ophpic2 | 82  | --- | SDASIFAPSADNVQIGFRR  | AELLP  | ASNSGT | DASTLG  | IKTLHFS | LMOD    | PQRPLNL | THE     |
| Spobra2 | 83  | --- | SDKSIFAPSADNVQIGFRR  | AELLP  | ASNSGT | DPSTQG  | IKTLHFS | VMQDA   | QRPLNL  | THE     |
| Spoins2 | 83  | --- | SDQSIFAPSADNVQIGFRR  | AELLP  | ASNSGT | DPSTQG  | IKTLHFS | VMQDA   | QRPLNLS | SHE     |
| Phamin2 | 90  | --- | SDQSIFAPSADNVQIGFRR  | AELLP  | ASNSGT | DPSTTG  | IKTLHFS | VMKDA   | DRPLNLS | SHE     |
| Podans2 | 84  | --- | SDASIF-----          | NGQ    | TGFRRA | ELLP    | ASNSGT  | DDSTTG  | IKTLHFS | LQKDA   |
| Diaamp2 | 85  | --- | SDESIFAPSADNVQLGFRRA | ELLP   | ASNSGT | DASTLG  | IKSLHFS | LMKDA   | ARPLNLS | SHE     |
| Diahel2 | 85  | --- | NDDSIFAPSADNVQLGFRRA | ELLP   | ASNSGT | DPSTQG  | IKSLHFS | LMKDA   | ARPLNLS | SHE     |
| Psevex2 | 88  | --- | DDKSIFTPSADNVQLGFRRA | ELMITS | NSDGT  | DDSTLG  | IKTLHFS | LMKDA   | ARPLNLS | SHE     |
| Thiter2 | 89  | --- | SDNSIF-----          | NGQ    | VGFRRA | ELLP    | ASNSGT  | DPSTQG  | IKTLHFS | VMKDA   |
| Gaetri2 | 89  | --- | DDKSIFVFNADTVQNGFR   | RV     | ELLA   | ASNSGT  | DDSTKG  | IKTLHFS | IAKDC   | ORALNL  |
| Magory2 | 90  | --- | NDKSIFVFNADTVQNGFR   | RT     | ELL    | IASNSGT | DDSTKG  | IKTLHFS | IAKDLK  | QPLNL   |
| Maggr2  | 98  | GIP | SDKSIFVFNPDTVQNGFR   | RT     | ELL    | IASNSGT | DDSTKG  | IKTLHFS | IAKDA   | QRPLNL  |
| Cerpla2 | 80  | --- | NDTSIFAPSETNVQNGFRRA | ELLP   | ASNSGT | DPSTTG  | IKTLHFS | LKKDA   | QRPLNLS | SHE     |
| Thipun2 | 82  | --- | NDKSIFAPSPDNVQVGFRRA | ELLP   | ASNSGT | DNSTLG  | IKTLHFS | LKKDI   | TRPLNLS | SHE     |
| Colglo2 | 88  | --- | DDRSIFAPTETNVQIGFRR  | AELP   | MSNGT  | DPSTAG  | IKTVHFS | MMKDP   | KRPLNL  | THE     |
| Colnym2 | 87  | --- | DDRSIFAPTETNVQIGFRR  | AELP   | MSNGT  | DPSTSG  | IKTVHFS | MMKDP   | KRPLNL  | THE     |
| Stacha2 | 84  | --- | DDSSIFAPSADNVQIGFRR  | VELLP  | ASNSGT | DDSTLG  | IKTLHFS | VMKDV   | TRPLNLS | SHE     |
| Stach12 | 84  | --- | DDSSIFAPSADNVQIGFRR  | VELLP  | ASNSGT | DDSTLG  | IKTLHFS | VMKDI   | TRPLNLS | SHE     |
| Clapur2 | 96  | --- | NDRSIFAPSVSNVQVGFR   | RT     | ELL    | IASNSG  | KDISTG  | IKTLHFS | IAKDP   | ARPLNLD |

|         |     |      |         |        |       |       |         |     |       |        |         |       |       |       |
|---------|-----|------|---------|--------|-------|-------|---------|-----|-------|--------|---------|-------|-------|-------|
| Colhig2 | 156 | YQLA | FLESAD  | FSTNQ  | IVLKT | GTIL  | -GQ-N-- | TE  | DPDTL | QLFGN  | VATSP   | -PPEL | FKTK  | KFTF  |
| Colchl2 | 154 | YQLV | FLESAD  | FSTNQ  | IVLKT | GTIL  | -GQ-N-- | TA  | DPDTL | QLFGN  | VNSSP   | -VPEL | FKTK  | KFTE  |
| Colfio2 | 157 | YQLV | FLESAD  | FSTNQ  | IVLKT | GTIL  | -GQ-N-- | TA  | DPDTL | QLFGN  | VNSSP   | -VPEL | FKTK  | KFTA  |
| Colsim2 | 157 | YQLV | FLESAD  | FSTNQ  | IVLKT | GTIL  | -GQ-N-- | TA  | DPDTL | QLFGN  | VNSSP   | -VPEL | FKTK  | KFTA  |
| Colinc2 | 156 | YQLV | FLESAD  | FSTNQ  | IVLKT | GTIL  | -GQ-N-- | TE  | DPDTL | QLFGN  | VASSP   | -TPEL | FKTK  | KFTF  |
| Coltof2 | 156 | YQLV | FLESAD  | FSTNQ  | IVLKT | GTIL  | -GQ-N-- | TA  | DPDTL | QLFGN  | VASSP   | -TPEL | FKTK  | KFTF  |
| Colgra2 | 140 | YQLV | FLESAD  | FSTNQ  | IVLKT | GSIL  | -CQ-N-- | TA  | DPDTL | QLFGN  | VNSNP   | -VPEL | FQTK  | KFTF  |
| Colorb2 | 159 | YQLV | FLESAD  | FSTNQ  | IVLKT | GSIL  | -GE-N-- | TA  | DPDTL | QLFGN  | VASSP   | -VPQL | FSTK  | KFTF  |
| Lompro2 | 143 | YQLV | FLESND  | FSTNQ  | IVLKT | GTIL  | -GV-N-- | TA  | DPDTL | QLFGN  | VNQG--- | NILF  | STPF  | FTA   |
| Sceapi2 | 142 | YQLV | FLESAD  | FSTNQ  | IVLKT | GTIL  | -GG-N-- | TA  | DPDTL | QLFGN  | VNQG--- | QILF  | STPF  | FTA   |
| Rosnec2 | 142 | YQLV | FLESND  | FSTNQ  | IVLKT | GSIL  | -GA-N-- | TA  | DPDTL | QLFGN  | VNANP   | -VQTL | FSVP  | PFTE  |
| Conlig2 | 143 | YQLV | FLESND  | FSTNQ  | IVLKT | GTIL  | -GA-G-- | AG  | DPDTL | QLFGN  | VNESP   | -PKV  | LFST  | PFQA  |
| Groc1a2 | 141 | YQLV | FLESSD  | FSTNQ  | IVLKT | GTIL  | -GQ-E-- | TA  | NPDTL | QLFGN  | VNVNP   | -PQV  | LFST  | PFLLP |
| Ophpic2 | 139 | YQLV | FLESAD  | FSTNQ  | IVLKT | GTIL  | -GSTD-- | GV  | DPNTL | QLFGN  | VNANP   | -PQV  | LFST  | PFFTP |
| Spobra2 | 140 | YQLV | FLESND  | FSTNQ  | IVLKA | GTIL  | -CQAG-- | NV  | DPNTL | QLFGN  | VNSNP   | -PQV  | LFST  | PFFTP |
| Spoins2 | 140 | YQLV | FLESND  | FSTNQ  | IVLKT | GTIL  | -CGAA-- | GV  | DPNTL | QLFGN  | VNANP   | -PQV  | LFST  | PFFTP |
| Phamin2 | 147 | YQLV | FLESND  | FSTNQ  | IVLKT | GTIL  | -GQ-A-- | TA  | DPDTL | QLFGN  | VNDG--  | -ANV  | LFST  | PFVVD |
| Podans2 | 136 | YQLV | FLESND  | FSTNQ  | IVLKT | GTIL  | -GGDT-- | AV  | DPDTL | QLFGN  | VNQTP   | -SKL  | LFST  | VPFLD |
| Diaamp2 | 142 | YQLV | FVLESSD | FSTNQ  | IVLKT | GTIL  | -DTATQ  | GGV | DPDSL | ILFGN  | VKQS--- | QILF  | NTAF  | TFTE  |
| Diahel2 | 142 | YQLV | FVLESSD | FSTNQ  | IVLKT | GTIL  | -DTATQ  | KG  | VDPSL | ILFGN  | VKQS--- | EQ    | LFST  | PFTE  |
| Psevex2 | 145 | YQLF | FLESAD  | FSTNQ  | IVLKT | GSIL  | -GA-D-- | TP  | NPDTL | QLFGN  | VNSSP   | -LQ   | TLFST | NFTE  |
| Thiter2 | 141 | YQLV | FLESND  | FSTNQ  | IVLKT | GTIL  | -GQ-N-- | TA  | DPDTL | QLFGN  | VNQG--- | QILF  | STPF  | VVD   |
| Gaetri2 | 146 | YQLV | FLEDNS  | FSTNQ  | IVLKT | GTIA  | -GQ-N-- | GN  | PDTL  | QLFGN  | VKESP   | -PKV  | LFST  | PFFAA |
| Magory2 | 147 | YQLV | FLEDNKF | FSTNQ  | IVLKT | GTID  | -GQ-A-- | NT  | PDTL  | QLFGN  | VASSP   | -PKL  | LFST  | PFPGA |
| Maggr2  | 158 | YQLV | FLEDNKF | FSTNQ  | IVLKT | GTIA  | -CQ-T-- | SN  | TNTL  | QLFGN  | VNASP   | -PKL  | LFST  | PFFAA |
| Cerpla2 | 137 | YQLV | FLEDNST | FSTNQ  | IVLKT | GTILT | -GQ-N-- | AS  | DPDTL | QLFGN  | VNQKE   | -PGM  | IFSAP | FTF   |
| Thipun2 | 139 | YQLV | FLEDNST | FSTNQ  | FALK  | GTIL  | -GQ-N-- | TN  | PDTL  | QLFGN  | VNDAK   | -PGL  | IFSAP | FTTA  |
| Colglo2 | 145 | YQM  | VFLESS  | IFSSNQ | YALK  | YGDIL | -GI-H-- | PA  | DPDV  | LHLFGN | SNTKP   | FPQ   | ELFRT | KFTD  |
| Colnym2 | 144 | YQM  | VFLESS  | IFSSNQ | FALK  | YGDIL | -GI-H-- | PA  | DPDV  | LHLFGN | SNTNP   | -SPE  | LFKTK | FTE   |
| Stacha2 | 141 | YQLV | FLESAD  | YSNSQ  | FDIK  | GTIL  | -GR-D-- | TP  | DPDT  | IQVYGN | INAG--  | -AALL | YSTP  | PFTE  |
| Stach12 | 141 | YQLV | FLESAD  | YSNSQ  | FDIK  | GTIL  | -GR-D-- | TP  | DPDT  | IQVYGN | INAG--  | -AALL | YSTP  | PFTE  |
| Clapur2 | 153 | YQLS | FLEDSS  | FSTNQ  | FVLKT | GNIT  | -GV-N-- | TL  | DPDSL | TLFGN  | TNKF--  | -GDV  | LFST  | PFFTA |

|         |     |                                                                |
|---------|-----|----------------------------------------------------------------|
| Colhig2 | 211 | GVFHNFAIKLDEFTANTTEVFYSQGTSALKSQGAAPNIAGQGQYHFGILKKPVNGGADI    |
| Colchl2 | 209 | GVFHNFAIKLDFTKNTTEVFYSQGN SALKSQGAPVSNLAGKGQYHFGMLKKPVNGGSDI   |
| Colfio2 | 212 | GVFHNFAIKLDFTKNTTEVFYSQGN SALKSTGAAVTNNLAGQGQYHFGMLKKPVNGGSDI  |
| Colsim2 | 212 | GVFHNFAIKLDFTKNTTEVFYSQGN SALKSTGAAVANNLAGQGQYHFGMLKKPVNGGSDI  |
| Colinc2 | 211 | GVFHNFAIKLDEFTANTTEVFYSQGN SALKSQGA VANNLAGQGQYHFGMLKKPVNGGADI |
| Coltof2 | 211 | GVFHNFAIKLDEFTANTTEVFYSQGN SALKSQGAPVANNLAGQGQYHFGILKKPVNGGDDI |
| Colgra2 | 195 | GVFHNFAIKLDEFTANTTQVFYSQGN SALKSQGAPVANNLAGKGQFHFGVLKKPVNGGADI |
| Colorb2 | 214 | GVFHNFAIKLDFTKNTTEVFYSTDN SALKSQGA VANNLAGQGQYHFGVLKKPVNAGSDM  |
| Lompro2 | 196 | GVFHNFGITLDEFDALTTQVFYSTGDDPLEQQTDAANDVSGQGQFHFGVLKKPTDSAGDI   |
| Sceapi2 | 195 | GVFHNFGVVLDEFDALTTQVLYSTGDDPLEAQTDADNDVSGEGQFHFGVLKKPTDSAGDI   |
| Rosnec2 | 197 | DVFHNFAVTLDFDALTTQVFYSQGVDA LVAQTEALANDVSGQGQFHFGVLKKGLNGGDDI  |
| Conlig2 | 198 | GVFHNFGVMLDFDKLTSQVFHSTGTTALKAVTQALANDVSGQGQFHFGVLKKGI-GGNNI   |
| Grocla2 | 196 | DVFHNFAVTLDFENNLTTQVFHSTGNSSLKAVTQALSNDISGQGEFHFGMLKKPIDGGSDI  |
| Ophpic2 | 195 | GVFNFAVTLDFENNLTSQVFHSTGKSP LKPVTQALSNDVSGQGQFHFGMLKKPIDGGNDI  |
| Spobra2 | 196 | GVFHNFAVTLDFENKLTSQVFHSTGTTALKSVTQALANDVSGQGQFHFGVLKKPVNPGADI  |
| Spoins2 | 196 | GVFQNFVTLDFDKLTSQVFHSTGTSPLKAQTQALSNDVSGQGQFHFGVLKKGLDGGDDI    |
| Phamin2 | 201 | GAFHNFGVTLDFENNLTTQVFHSACTDALEAVTQPLANDVSGQGQFHFGVLKKGLNGGDDI  |
| Podans2 | 192 | GVFHNFAVTLDEDTLTTQVFHSAGGDPLEVVNQVSNNDVSGQGQFHFGLLKKPTDAVGDI   |
| Diaamp2 | 198 | GVFHNFGITLDFDANTTQVFYSTGNDPLAQVTEPLPNDISGQGQYHFGVLKKGVNGGDDI   |
| Diahel2 | 198 | GVFHNFGITLDFENANTTQVFYSTGNEPLAQVTDALPNDISGQGQYHFGVLKKGVNGGSDI  |
| Psevex2 | 200 | GVFHNFAVTLDFEDKNTTQVFYSQDSSALEAQTEPLANDVSGQGQYHFGVLKKGIGGDVDI  |
| Thiter2 | 194 | GVFHNFAIKLDFDQSTTQVFHSAGEDPLKAVTGVLNDISGQGQFHFGVLKKPVGGQGI     |
| Gaetri2 | 201 | NGFHNFGITLDFENKNTVQVLESTGAQPLKAVTQPLANDESGGGQYHFGMLKKGLGGGADI  |
| Magory2 | 202 | DGFHNFAVTLDFTKNTTQVFHSTGNSPLKAVSKAEPNDVSGGGQFHFGCLKKGVGVKVDV   |
| Maggri2 | 213 | EGFHNFAIKLDEDKNTTQVFHSTGSEALKAVSKEESNDVSGGGQFHFGILKKGVGNAKDI   |
| Cerpla2 | 193 | GTfHNFGIKLDEFTANTTQVFYSTGNCELTQQTTEPLNNDVSGQGQFHFGILKKPTGETTDV |
| Thipun2 | 194 | GKFHNFAIKLDFENANTTQVFYSTGNCSLSQQTTEALANDVSGQGQFHFGILKKPTGNFTDI |
| Colglo2 | 201 | GVFHNFAVTLDFTKNMTQVLYSQGSAP LVAQGKPVENDISGQGQFHFGVLKKSINGTGDT  |
| Colnym2 | 199 | GVFHNFAVTLDFGKNLTQVLYSQGNAP LVAQGQPVENDISGQGQFHFGVLKKSINGTGDL  |
| Stacha2 | 195 | GVIHNFAIRLDYETGTTQVLYSQDCAQLQSVTDIANDISGQGQYHIGLKKPTGSDGDI     |
| Stachl2 | 195 | GVIHNFAIRLDYETGTTQVLYSQDCAQLQSVTDIANDISGQGQYHIGLKKPTGSDGDI     |
| Clapur2 | 207 | GTfHNFAIRLDFTRNTEVRYSTGLHALKSVTGPRANDISGQGQYHFGILKKGLNGNGD-    |

|         |     |                                           |
|---------|-----|-------------------------------------------|
| Colhig2 | 271 | TKSGDQPADIDEGIIYAGIFQEDSANGCISLSP         |
| Colchl2 | 269 | TKSGDQPSGINEGIIYGGIFQEDSSSGCISLSP         |
| Colfio2 | 272 | TKSGDQPTGINEGIIYGGIFQEDSSAGCISLSP         |
| Colsim2 | 272 | TKSGDQPTGINEGIIYGGIFQEDSSAGCISLSP         |
| Colinc2 | 271 | TKSGDQPSGINEGIIYAGIFQEDSANGCISLSP         |
| Coltof2 | 271 | TKSGDQPSGINEGIIYAGIFQEDSSSTGCISLSP        |
| Colgra2 | 255 | SKSGEQPANINEGIIYGGIFEDSSSTGCISLSP         |
| Colorb2 | 274 | TKSGDQPANIDEGIIYGGIFQEDSSSGCISLSP         |
| Lompro2 | 256 | TKDGFQEQAGIDEGIIYAGIFQEDSSDGCISLSL        |
| Sceapi2 | 255 | TKDGFQEQAGIDEGIIYAGIFQEDSSDGCISLSL        |
| Rosnec2 | 257 | VKNGEQEPGIDEGIIYGGIFEDSSDGCITLSV          |
| Conlig2 | 257 | VKDGVQEQAGIDEGIIYGGIFEDSSAGCVSLSP         |
| Grocla2 | 256 | VHNGTQESDIDEGIIYGGIFEDSSSTGCVSLSP         |
| Ophpic2 | 255 | VHNGTQEDGIDEGIIYGGIFEDSSSTGCISLCA         |
| Spobra2 | 256 | VHSGTQEPGINEGIIYGGIFEDSSSTGCISLSP         |
| Spoins2 | 256 | VHDGIQEPGINEGIIYGGIFEDSSSTGCVSLSP         |
| Phamin2 | 261 | VKNGEQEQAGINEGIIYGGIFEDSSSTGCISLSP        |
| Podans2 | 252 | TRNGFQEDGIDEGIIYGGIFQEDSSAGCVSLRP         |
| Diaamp2 | 258 | TKDGGQPPAGIDEGIIYGGIFQEDSAASSITLSLSP (40) |
| Diahel2 | 258 | TRDAQQPSGISEGIIYGGIFLEDSSASTITLSLSP (34)  |
| Psevex2 | 260 | TRLAQFPAGIDEGIIYGGIFQEDSADGCISLSA         |
| Thiter2 | 254 | TKNGFQEQAGINEGIIYGGIFEDSSAVGCIILAG (3)    |
| Gaetri2 | 261 | VRNGVQPPAGINEGIIYGGIFMEDSSSTGCVSLAP (16)  |
| Magory2 | 262 | VREGIQEPNINEGIIYGGIFEDSSANGCISLSA (56)    |
| Maggri2 | 273 | IRDGIQEPANINEGIIYSGIFMEDSSADGCVSLST (22)  |
| Cerpla2 | 253 | TKSGFQPADIDEGIIYSGIFSEDSADGCVSLSP (4)     |
| Thipun2 | 254 | TKSGFQESGINEGIIYSGIFMEDSADDCITLSLR (4)    |
| Colglo2 | 261 | TKTGFHESGINEGIIYGGIFEDSSADGCVSLSP         |
| Colnym2 | 259 | TKSGFHESGINEGIIYSGIFEDSSIDGCVTLSL         |
| Stacha2 | 255 | TRRGFQSSGINEAVIYGGIFLEDSSADGCISLGP (15)   |

Stachl2 255 TREGFQSSGINEAVLYGGIFLEDSADGCLSLGP(15  
 Clapur2 266 SKKGTQETGINEGLIYGGIFMEDSSENCRCNY-

## **Sordariomycetes**

### **Hypocreomycetidae - Glomerellales (Colletotrichum but not Verticillium)**

Colchl2 = OLN97937.1 hypothetical protein CCHL11\_02648 [Colletotrichum chlorophyti]  
 Colfio2 = EXF80808.1 hypothetical protein CFIO01\_01179 [Colletotrichum fiorinae PJ7]  
 Colglo2 = KAF3811743.1 hypothetical protein GCG54\_00014494 [Colletotrichum gloeosporioides]  
 Colgra2 = XP\_008098621.1 hypothetical protein GLRG\_09745 [Colletotrichum graminicola M1.001]  
 Colhig2 = TID06827.1 hypothetical protein CH35J\_000821 [Colletotrichum higginsianum], which is equivalent to CH063\_00647 described by Anasontzis et al. (2019) except the signal peptide sequence is correct  
 Colinc2 = KZL82458.1 hypothetical protein CI238\_03137, partial [Colletotrichum incanum]  
 Colnym2 = KXH25668.1 hypothetical protein CNYM01\_07213 [Colletotrichum nymphaeae SA-01]  
 Colorb2 = TDZ16663.1 hypothetical protein Cob\_v010277 [Colletotrichum orbiculare MAFF 240422]  
 Colsim2 = KXH47399.1 hypothetical protein CSIM01\_05336 [Colletotrichum simmondsii]  
 Coltof2 = KZL71646.1 hypothetical protein CT0861\_07364 [Colletotrichum tofieldiae]

### **Hypocreomycetidae - Hypocreales - Clavicipitaceae (in Claviceps purpurea and other Claviceps species but not Metarhizium, Moelleriella libera, Pochonia chlamydosporia or Torrubia hemipterigena)**

Clapur2 = KAG6202730.1 hypothetical protein E4U50\_006098 [Claviceps purpurea]

### **Hypocreomycetidae - Hypocreales - Cordycipitaceae - no orthologues found**

### **Hypocreomycetidae - Hypocreales - Hypocreaceae - no orthologues found**

### **Hypocreomycetidae - Hypocreales - Nectriaceae - no orthologues found**

### **Hypocreomycetidae - Hypocreales - Ophiocordycipitaceae - no orthologues found**

### **Hypocreomycetidae - Hypocreales - Stachybotryaceae**

Stacha2 = KFA47799.1 hypothetical protein S40293\_09048 [Stachybotrys chartarum IBT 40293]  
 Stachl2 = KFA69030.1 hypothetical protein S40285\_08453 [Stachybotrys chlorohalonata IBT 40285]

### **Hypocreomycetidae - Microascales**

Cerpla2 = KKF95434.1 hypothetical protein CFO\_g2225 [Ceratocystis platani]  
 Thipun2 = KKA28951.1 hypothetical protein TD95\_005422 [Thielaviopsis punctulata]  
 Lompro2 = PKS05998.1 hypothetical protein jhhlp\_007831 [Lomentospora prolificans]  
 Sceapi2 = XP\_016645553.1 hypothetical protein SAPIO\_CDS1553 [Scedosporium apiospermum]

### **Sordariomycetidae - Coniochaetales**

Conlig2 = OIW32631.1 hypothetical protein CONLIGDRAFT\_699488 [Coniochaeta ligniaria NRRL 30616]

### **Sordariomycetidae - Togniniales**

Phamin2 = XP\_007911498.1 hypothetical protein UCRPA7\_713 [Phaeoacremonium minimum UCRPA7]

### **Sordariomycetidae - Diaporthales**

Coniella lustricola - no orthologue found  
 Diaamp2 = KKY30855.1 hypothetical protein UCDDA912\_g09201 [Diaporthe ampelina]  
 Diahel2 = POS74227.1 hypothetical protein DHEL01\_v207386 [Diaporthe helianthi]

### **Sordariomycetidae - Magnaporthales**

Gaetri2 = XP\_009219288.1 hypothetical protein GGTG\_03245 [Gaeumannomyces tritici R3-111a-1]  
 Magory2 = QBZ65172.1 hypothetical protein PoMZ\_06877 [Pyricularia oryzae] (syn. Magnaporthe oryzae)  
 Maggri2 = XP\_030976736.1 hypothetical protein PgNI\_11158 [Pyricularia grisea]

### **Sordariomycetidae - Ophiostomataceae**

Grocla2 = XP\_014171689.1 hypothetical protein CMQ\_2256 [Grosmanella clavigera kw1407]  
 Ophpic2 = EPE10934.1 hypothetical protein F503\_06029 [Ophiostoma piceae UAMH 11346]  
 Spobra2 = XP\_040620669.1 uncharacterized protein SPBR\_02939 [Sporothrix brasiliensis 5110]  
 Spoins2 = OAA67092.1 hypothetical protein SPI\_01668 [Sporothrix insectorum RCEF 264]  
 Sposch2 = XP\_016591024.1 hypothetical protein SPSK\_07672 [Sporothrix schenckii 1099-18]

### **Sordariomycetidae - Sordariales - Sordariales incertae sedis**

Madurella mycetomatis - no orthologue found

### **Sordariomycetidae - Sordariales - Chaetomiaceae**

Chaetomium thermophilum var. thermophilum - no orthologue found  
 Podans2 = XP\_001908978.1 uncharacterized protein PODANS\_3\_2140 [Podospira anserina S mat+] corrected for upstream methionine start and unrecognised intron  
 Thermostelomyces thermophilus - no orthologue found  
 Thiter2 = SPQ19874.1 44879d5e-d898-4d54-8381-2fd604ce673d [Thermostielavioides terrestris](syn. Thielavia terrestris)with corrected N-terminal sequence in place of erroneous starting methionine

### **Sordariomycetidae - Sordariales - Sordariaceae - no orthologues found**

### **Xylariomycetidae - Xylariales**

Eutypa lata - no orthologue found

Daldinia sp. - no orthologue found  
Hypoxyton sp. - no orthologue found  
Microdochium bolleyi - no orthologue found  
Pestalotiopsis fici - no orthologue found  
Psevex2 = XP\_040720469.1 uncharacterized protein BCR38DRAFT\_334322 [Pseudomassariella vexata]  
Rosnec2 = GAP88082.1 hypothetical protein SAMD00023353\_3201390 [Rosellinia necatrix]

**Supplementary Figure S7. ChGluc131A alignment.** Multiple protein-sequence alignment of ChGluc131A orthologues in the Fol-EC4 clade of Sordariomycete GH131 (glycosyl-hydrolase 131) sequences. All sequences shown were the highest blastP matches to ChGluc131A (= Colhig2 highlighted in green in the alignment) obtained for each genome-sequenced species represented. Sequences were aligned using ClustalW at <https://www.ebi.ac.uk/Tools/msa/mafft/>. Amino-acid identities were highlighted in black and similarities in grey using BoxShade at [https://embnet.vital-it.ch/software/BOX\\_form.html](https://embnet.vital-it.ch/software/BOX_form.html). Conserved cysteines have been highlighted manually in blue, residues conserved with the catalytic residues of PaGluc131A and CcGH131A in red and non-conserved residues in teal. The number of C-terminal residues removed manually for the purposes of alignment are shown in brackets at the end of the alignment.
