# Supplementary material for: Transcriptome Analysis of Fusarium–Tomato Interaction Based on an Updated Genome Annotation of Fusarium oxysporum f. sp. lycopersici Identifies Novel Effector Candidates That Suppress or Induce Cell Death in Nicotiana benthamiana
Source: MDPI journal article supplement (doi:10.3390/jof8070672), 2022-06-26
Supplement: s1 [file s1]

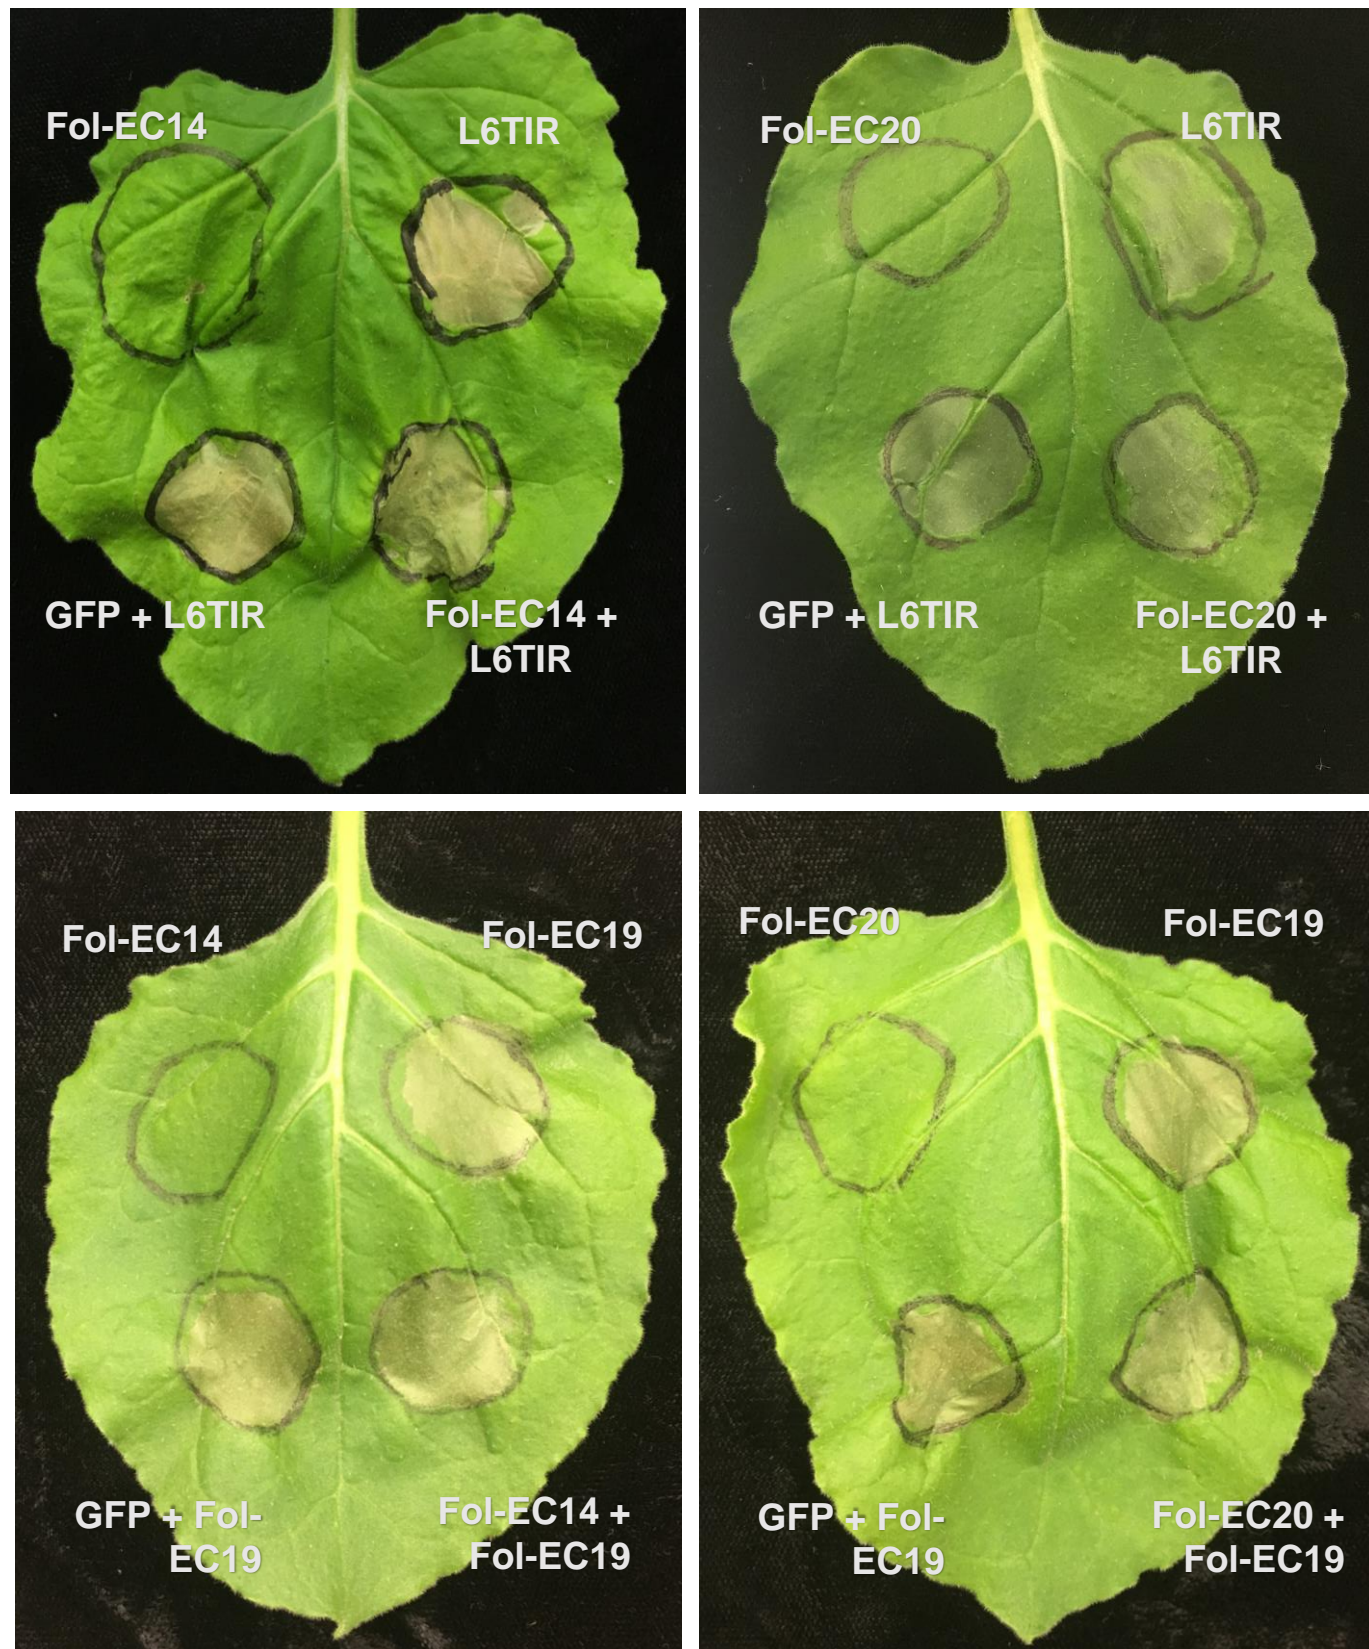

**Supplementary Figure S4. FolEC-14 and Eol-EC20 are not able to inhibit L6TIR- and Fol-EC19-induced cell death in *N. benthamiana* leaves.**
