# Supplementary material for: Transcriptome Analysis of Fusarium–Tomato Interaction Based on an Updated Genome Annotation of Fusarium oxysporum f. sp. lycopersici Identifies Novel Effector Candidates That Suppress or Induce Cell Death in Nicotiana benthamiana
Source: MDPI journal article supplement (doi:10.3390/jof8070672), 2022-06-26
Supplement: s1 [file s1]

Colhig3 1 MILPHAAVRSLQALSINAAQPLQSSSIQCPIVLDGRIPQNFTLQVFDTNESPFNPGFTK  
Colinc3 1 MMVPHMAVRSLQALSINSAQSLQSSVQCPIVLDGRIPQNFSLQVFDTNESPFNPGFTK  
Coltof3 1 MVLPHAAVRSLQALSINSAQSLQLPVQCPIVLDGRIPQNFSLQVFDTNDSPFNPGFTK  
Colfio3 1 MILPHAAVRSLQALSINAPRASFDSPVKCPVVDGRIPQNFTLQVFDTYASPFNPGYTK  
Colnym3 1 MILPHAAVRSLQALSINAPRASLDSPVKCPVVDGRIPQNFTLQVFDTYASPFNPGYTK  
Colsim3 1 MILPHAAVRSLQALSINAPRASLDSPVKCPVVDGRIPQNFTLQVFDTYDSPFNPGYTK  
Colsal3 1 MILPHAAVRSLQALALNVPRASLDSPVKCPVVDGRIPQNFTLEVFDTSTSPFNPGFTK  
Colchl3 1 MILPHTAVRSLQALSINAPFQSFO-SPVRCPVVDGRIPQNFTLEIFDTNASPFNPGFTK  
Colglo3 1 MILPHLAVRAL-S-----ASVQCPIVLDGRISQNFTLENFDTNVSPVNPNGFTK  
Colorb3 1 MILPQVAARALLGLS-----SAVKCPIVLDGRIPQNFTLDDFDTNASPFNPGFTK

Colhig3 61 GPAPWSEILLFPAGVTPSRFDVSEPE---TATSEFKPLEVTIDDKSIFD-PSGNNPQLGFR  
Colinc3 60 GPAPWSDILLFPTNTTPSRFDVSN-----STGNFKPEVETINDQSIFD-PSGNNPQVIGFR  
Coltof3 60 GPAPWSEILLFPALTTPSRFDVSS-----STGDSKPEVETINDQSIFD-PSGNNPQVIGFR  
Colfio3 60 GPAKWSEILLFPVPTPSRFDASN-----ATGSEFKPLEVTINDQSIFN-PSGNSPQLGFR  
Colnym3 60 GPAKWSEILLFPVPTPSRFDTSN-----ATGNFKPLEVTINDQSIFN-PSGNSPQLGFR  
Colsim3 60 GPAKWSEILLFPVPTPSRFDTSN-----ATGNFKPLEVTINDQSIFN-PSGNSPQLGFR  
Colsal3 60 GPAPWSEILLFPVPTPSRFDASN-----ATGNFKPLEVTINDQSIFN-PSGNSPQLGFR  
Colchl3 60 GPALWSEILLFPNISTTPSRFDVSS-----QTGDFKPLEVTINDQSIFNPPPGNNPQLGFR  
Colglo3 48 GSDPWSKIILLFPTVAAPSRFDAAASANATSGSGFKPLEVTINDRSIFNPPPGKNPQLGFR  
Colorb3 51 GPDPWSKILLFPFVAQTSRFDVAGR----SPANTKPLEVTINDDSIFNPPPGKNPQLGFR

Colhig3 117 RAGLLLGNGSDASNQGVMTFHWSSRQDPARKLNLTHEYLTSFHETNDSGGAQFSLQVGTGP  
Colinc3 114 RAGLLLGNGSDASNQGVMTFHWSSMQDPTRKLNLTHEYLVSFHETNDSGGAQFALQIGTGP  
Coltof3 114 RAGLLLGNGSDASNQGVKTFHWSSRQDSTRKLNLTHEYLTFSFHETNDSGGAQFALQIGTGP  
Colfio3 114 RAGLLLGNGSDASNQGVMTTHWSSMQDSTRKLNLTHEYLTFSFHETNDSGGAQFALQIGTGP  
Colnym3 114 RAGLLLGNGSDASNQGVMTTHWSSMQDSTRKLNLTHEYLTFSFHETNDSGGAQFALQIGTGP  
Colsim3 114 RAGLLLGNGSDASNQGVMTTHWSSMQDSTRKLNLTHEYLTFSFHETNDSGGAQFALQIGTGP  
Colsal3 114 RAGLLLGNGSDASNQGVMTTHWSSMQDSTRKLNLTHEYLTFSFHETNDSGGAQFALQIGTGP  
Colchl3 115 RAGLLLGNGSDASNEGVMTFHWSSRQDSARKLNLTHEYLTAFHETNDSGGAQFALQIGTGP  
Colglo3 108 RAGLLLGNGSDASNQGVMTFHWSSAMQDSARKLNLTHEYLTFSFHETNDSGGAQFALQVGLP  
Colorb3 107 RAGLLLGNGSDAANECAVTTHWSSRQDPARLNLTHEYATAFHETNDSGGAQFTLQVGLP

Colhig3 177 LGQDGAAGKPAASDWKMLNRNNIVVFSTPLKFDAWQNEAVTLDVPKNTMQVYFSEGNDPL  
Colinc3 174 LGQNGTAGRPSPTDWKMLDRNNIVVFSTPLKFDAWQNEAVTLDVPKNTMQVFFSEGNDPL  
Coltof3 174 LGQNSTAGRPSLSDWKMLDRNNIVVFSTPLKFDAWQNEAVTLDVPKNTMQVFFSEGNEPL  
Colfio3 174 LGQNSTAGKPLSNDWKMLDRNNSVIFSTALKFDVWQNWAVTLDVPKNTIQVFFSEGNDPL  
Colnym3 174 LGQNSTAGKPLSTDWKMLDRNNSVIFSTALKFDVWQNWAVTLDVPKNTIQVFFSEGNDPL  
Colsim3 174 LGQNSTVGKPLSTDWKMLDRNNSVIFSTALKFDVWQNWAVTLDVPKNTIQVFFSEENDPL  
Colsal3 174 LGQNSTTGGPSSADWKMLDRNNSVIFSTALKFDVWQNWAVTLDVPKNTIQVFFSEGNDPL  
Colchl3 175 LGQNSTLSGEASSDWKMLDRDNKVVVFSTPLKFDAWQNEGVTLDIPNNTLQVYFSEGDDPL  
Colglo3 168 LGQNGT--EPPKENWKMLDRNNSVVFSTPLKFDTWQNWAVTLDVPQNTMQVFFSEGNEPL  
Colorb3 167 LGQNKNT--EPPAANWKMLNRNNSIVVFSTPLQFGKWQNEAVTLDVPKNTMQVYYSEGNEPL

Colhig3 237 KPVTEILPNDNSGGGALQIGLLKKPTETKTIVVFDGFGQESNLDEGQILGSI FVEDSANGCV  
Colinc3 234 KPVTEVLPNDNSGGGALQIGLLKKPTETKTIVVFDGFGQESNLNEGQILGGIFVENSANGCI  
Coltof3 234 KPVTEVEIPNDNSGGGVLOIGLLKKPTETKTAVFDGFGQESNLNEGQILGGIFVEDSANGCV  
Colfio3 234 KSVTEVLPNNNAGGGALQIGLLKKPTETKTIVVNDGFGQESNLNEGQILGGIFVENSANGCV  
Colnym3 234 KSVTEVLPNNNVGGGALQIGLLKKPTETKTIVVNDGFGQENLNEGQILGGIFVENSANGCV  
Colsim3 234 KSVTEVLPNNNVGGGALQIGLLKKPTETKTIVVNDGFGQESNLNEGQILGGIFVENSANGCV  
Colsal3 234 KSVTEVLPNNNAGGGALQIGLLKKPTETKTIVVNDGFGQESNLNEGQILGGIFVENSANGCI  
Colchl3 235 KPVTEVLPNNNAGGGALQIGLLKKPTETTTAVFDGFGQENLNEGQILGGIFVENSANGCV  
Colglo3 226 KAVTKILPNNNAGGGALQIGLLKKPTETKTIVANDGFGQESNLNEGQILGGIFVENSANGCI  
Colorb3 225 SAVTGVLPNNNAGGGALQIGLLKKPTETKTIVVFDGFGQESNLNEGQILGGIFLENS SDGCV

Colhig3 297 SL  
Colinc3 294 SL  
Coltof3 294 SL  
Colfio3 294 SL  
Colnym3 294 SL  
Colsim3 294 SL

|         |     |    |
|---------|-----|----|
| Colsal3 | 294 | SL |
| Colchl3 | 295 | SL |
| Colglo3 | 286 | SL |
| Colorb3 | 285 | SL |

### **Sordariomycetes**

#### **Hypocreomycetidae - Glomerellales (Colletotrichum but not Verticillium)**

Colchl3 = OLN81946.1 hypothetical protein CCHL11\_08641 [Colletotrichum chlorophyti]  
 Colfio3 = EXF72940.1 hypothetical protein CFIO01\_04646 [Colletotrichum fiorinae PJ7]  
 Colglo3 = KAF3801482.1 hypothetical protein GCG54\_00014696 [Colletotrichum gloeosporioides]  
 Colletotrichum graminicola - no orthologue  
 Colhig3 = CCF43865.1 hypothetical protein CH063\_03177 [Colletotrichum higginsianum]  
 which is equivalent to CH063\_00647 described by Anasontzis et al. (2019)  
 Colinc3 = KZL79966.1 hypothetical protein CI238\_09667 [Colletotrichum incanum]  
 Colnym3 = KXH53449.1 hypothetical protein CNYM01\_01194 [Colletotrichum nymphaeae SA-01]  
 Colorb3 = TDZ24818.1 hypothetical protein Cob\_v002377 [Colletotrichum orbiculare MAFF 240422]  
 Colsal3 = KXH68549.1 hypothetical protein CSAL01\_02206 [Colletotrichum salicis]  
 Colsim3 = KXH27864.1 hypothetical protein CSIM01\_06783 [Colletotrichum simmondsii]  
 Coltof3 = KZL72700.1 hypothetical protein CT0861\_06503 [Colletotrichum tofieldiae]

#### **Hypocreomycetidae - Hypocreales - Clavicipitaceae - no orthologues**

#### **Hypocreomycetidae - Hypocreales - Cordycipitaceae - no orthologues**

#### **Hypocreomycetidae - Hypocreales - Hypocreaceae - no orthologues**

#### **Hypocreomycetidae - Hypocreales - Nectriaceae - no orthologues**

#### **Hypocreomycetidae - Hypocreales - Ophiocordycipitaceae - no orthologues**

#### **Hypocreomycetidae - Hypocreales - Stachybotryaceae - no orthologues**

#### **Hypocreomycetidae - Microascales - no orthologues**

#### **Sordariomycetidae - Coniochaetales - no orthologues**

#### **Sordariomycetidae - Togniniales - no orthologues**

#### **Sordariomycetidae - Diaporthales - no orthologues**

#### **Sordariomycetidae - Magnaporthales - no orthologues**

#### **Sordariomycetidae - Ophiostomataceae - no orthologues**

#### **Sordariomycetidae - Sordariales - Sordariales incertae sedis - no orthologues**

#### **Sordariomycetidae - Sordariales - Chaetomiaceae - no orthologues**

#### **Sordariomycetidae - Sordariales - Sordariaceae - no orthologues**

#### **Xylariomycetidae - Xylariales - no orthologues**

**Supplementary Figure S8. ChGluc131B alignment.** Multiple protein-sequence alignment of ChGluc131B orthologues in the Fol25 clade of Sordariomycete GH131 (glycosyl-hydrolase 131) sequences. All sequences shown were the highest blastP matches to ChGluc131B (= Colhig3 highlighted in green in the alignment) obtained for each genome-sequenced species represented. Sequences were aligned using ClustalW at <https://www.ebi.ac.uk/Tools/msa/mafft/>. Amino-acid identities were highlighted in black and similarities in grey using BoxShade at [https://embnet.vital-it.ch/software/BOX\\_form.html](https://embnet.vital-it.ch/software/BOX_form.html). Conserved cysteines have been highlighted manually in blue, residues conserved with the catalytic residues of PaGluc131A and CcGH131A in red and non-conserved residues in teal. None of these sequences were found to have predicted signal peptide sequences when analysed using SignalP 5.0 (<http://www.cbs.dtu.dk/services/SignalP/>) or SignalP 4.1 (<http://www.cbs.dtu.dk/services/SignalP-4.1/>) but Colorb3 and Colsal3 had predicted signal peptide sequences when analysed using SignalP 3.0 (<http://www.cbs.dtu.dk/services/SignalP-3.0/>) and all were predicted to be secreted proteins when analysed using Secretome P 2.0 (<http://www.cbs.dtu.dk/services/SecretomeP/>).
