# Supplementary material for: Transcriptome Analysis of Fusarium–Tomato Interaction Based on an Updated Genome Annotation of Fusarium oxysporum f. sp. lycopersici Identifies Novel Effector Candidates That Suppress or Induce Cell Death in Nicotiana benthamiana
Source: MDPI journal article supplement (doi:10.3390/jof8070672), 2022-06-26
Supplement: s1 [file s1]

## Signal peptide

|        |   |                                                               |
|--------|---|---------------------------------------------------------------|
| Colchl | 1 | -MKFTW---NI-ASAALLA-----TRA---QCEILWDGRFNDMTASTDLDKWSFGNPVGS  |
| Colhig | 1 | -MKFTW---SI-ASAALLA-----TRA---QCEILWDGRFNDMTASTDLDKWSFSNAVGP  |
| Colinc | 1 | -MKFTW---SI-ASAALLA-----TRV---QCEILWDGRFNDMTSSIDLDKWSFSSPVGS  |
| Colsim | 1 | -MKFTW---SI-ASAALLA-----TRA---QCEILWDGRFNDMTSATDLDKWSWSSQVGP  |
| Veralf | 1 | MMKFLA---TA-SAAFSLV-----SQC---HSAVLWDGRFNDLTSSTDLDKWSWATQVGP  |
| Verlon | 1 | MMKFLA---TA-SVAFSLV-----SQC---HSAVLWDGRFNDLTSSTDLNKWSWATQVGP  |
| Verdah | 1 | -MKFLA---TA-SAAFSLV-----SQC---YSAVLWDGRFNDLTSSTDLNKWSWATQVGP  |
| Conlig | 1 | -MKSPT---LA-SLAAQLL-----CVS---AGTILWDGRFNDLTSSTDLNTWSWSNQVGP  |
| Neucra | 1 | -MKFTL---LS-GLVAQAL-----SVS---AGSILWDGRFNDLTSATDLKSWSWSSQVGP  |
| Neutet | 1 | -MKFTL---LS-GLVAKAL-----SVS---AGSILWDGRFNDLTSATDLKSWSWSSQVGP  |
| Sormac | 1 | -MKFSV---LA-GLVAQAF-----TVS---AGTVLWDGRFNDFTSSIDLNKWSWGNQVGP  |
| Madmyc | 1 | -MRFPV---LS-SLAAQVL-----SVS---AGTILWDGRFNDLSSSTDLNNWSWGNQVGP  |
| Podans | 1 | -MKFHV---LS-GLVAQVL-----SVS---AGTILWDGRFNDMTSSADLNKWSWGNQVGP  |
| Chaglo | 1 | -MKFSV---LS-SILANAL-----SVS---AGTILWDGRFNDLSSSTDLNNWSWGNQVGP  |
| Thethe | 1 | -MRFSV---LS-SILANAL-----SAS---AGTILWDGRFNDLSSSKDLEKWSWANQVGP  |
| Thiter | 1 | -MKFSI---LP-SLLAGVV-----SVS---AGTILWDGRFNDLSSSTDLNNWSWSNQVGP  |
| Chathe | 1 | -MRLLT---LA-TLTAPAL-----GCNILLWDGRFNDLSSSLDLNKWSWSNQVGP       |
| Gaetri | 1 | -MRFSVANVLA-GTAYMAS-----AVA---AGTVIWDGRFNDLTSSTDLNKWSWGSQVGP  |
| Magory | 1 | -MRLSI---CT-AALSLTG-----GVV---AGTVIWDGRFNDMTSAADLNKWSWGNQVGS  |
| Maggri | 1 | -MRLSI---FT-APLSLMG-----GAV---AGTVIWDGRFNDMTSAADLNKWSWGNQVGS  |
| Stacha | 1 | -MKTVAAT-LL-AASSLWV-----GLA---SGAVLWDGRTNDMDSAEDLLDWSWGNQVGP  |
| Stachl | 1 | -MKTVAAT-LL-AASSLWV-----GLA---SGAVLWDGRTNDMDSAEDLLDWSWGNQVGP  |
| Micbol | 1 | -MKTSV---LV-SLFLGQL-----A-S---CGTVLWDGRFNDFTSADLDKWSWGNQVGP   |
| Colfio | 1 | -MKVTA---LL-TLVP-----LT---SAKVLWDGRFNDFTSSDLNKWSWSNQVGP       |
| Colnym | 1 | -MKVTA---LL-TLVP-----LT---SAKVLWDGRFNDFTSSDLNKWSWSNQVGP       |
| Colsal | 1 | -MKVTA---LL-TLLP-----LT---SAKVLWDGRFNDFTSSDLNKWSWSNQVGP       |
| Colgra | 1 | -MKTAA---LL-SLLP-----LA---SAKVLWDGRFNDLSSSTDLNNWSWSNQVGP      |
| Colsub | 1 | -MKAAA---LL-SLLS-----LA---SAKVLWDGRFNDLSSSTDLNKWSWSNQVGP      |
| Coltof | 1 | -MKAAA---LL-SLLP-----LT---SAKVLWDGRFNDLSSSSDLNKWSWANQVGP      |
| Colorb | 1 | -MKAAA---LL-AVLP-----LA---SAKVLWDGRFNDLTSSTDLNKWSWANQVGP      |
| Colglo | 1 | -MKAAA---LF-SLLP-----LA---SGKILLWDGRFNDLNSSTDLNKWSWANQVGP     |
| Phamin | 1 | -MQLTK-----ALIA-----SLAALGNAAVIWDGRFNDFTSSSDLNKWSWSNQVGP      |
| Pesfic | 1 | -MKAT-----ILLA-----SLA---KAAVLWDGRFNDFTSSADLNKWSWGNQVGP       |
| Psevex | 1 | -MKTT-----LLFA-----QVA---SAAVIVDGRFNDFTSSADLDKWSWSNQVGP       |
| Rosnec | 1 | -MKAST---LSAVLLV-----RLA---SAAIIVDGRFNEFTSSADLNKWSWSNQVGP     |
| Daldsp | 1 | -MKVTL---F--SALA-----AVA---SAAVLWDGRFNDLGTSAADLNKWSWSNQVGP    |
| Hyposp | 1 | -MKAAL---I--SVLA-----TVA---SAAVLWDGRFNDLGTSAADLNKWSWSNQVGP    |
| Ophpic | 1 | -MK-----GLLALCL-----AAAA---HAAVLWDGRFNEYSSAADLNNWSWSNQVGP     |
| Spobra | 1 | -MKLSN---SL-LLLT-----GTAA---QAAVLWDGRFNDLSSAADLNTWSWSNQVGP    |
| Sposch | 1 | -MKLSN---SL-LLLA-----GTAA---QAAVLWDGRFNDLSSAADLNTWSWSNQVGP    |
| Spoins | 1 | -MKLPG---SL-PLLASCLLPVFGGAA---RAAVLWDGRFNDLATASDLNKWSWSSQVGP  |
| Lompro | 1 | -MKLSP---S--ALLALAP-----ALA---NAAVLWDGRFNDMTSSADLDKWSWSNQVGA  |
| Sceapi | 1 | -MKLSP---S--ALLALAP-----ALV---NAAVIVDGRFNDLSSSADLDKWSWSNQVGA  |
| Diaamp | 1 | -MRAFS---LS-AAAALLA-----TAN---AGTVIWDGRFNDLSTSAADLATWSWSNQVGP |
| Neodit | 1 | -MKTFA---AF-ASLA-----GLA---AAEILWDGRFNDLESSADLADWSWSNQVGP     |
| Eutlat | 1 | -MKAPT---LL-ALLS-----GHLAA---CGTVIWDGRFNDLESAADLDEWDWSNQVGP   |
| Conlus | 1 | -MPSSSSSS-LIASLVGLLS---ASILTVQAGTVLWDGRFNDLSSSTDLDDWSWSNEVGP  |
| Cerpla | 1 | -MKSFA-----SLLLL-----GAPA---LASILWDGRFNDMTSSADLGKWSWSTPVGS    |
| Thipun | 1 | -MKSFA-----SLLFL-----SAPA---LASILWDGRFNS-STAAELSQWSWSNQVGP    |

|        |    |                                                                |
|--------|----|----------------------------------------------------------------|
| Colchl | 48 | YQYYIHGSGKTTTEYVNLSEDFKNPADTVSKQGAKISLTSTAFWNGQNMRRTELIPETKAA  |
| Colhig | 48 | YQYYIHGPGGETTEYVNLSEDFKNPADTASKQGAKISLTSTAFWNGQNMRRTELIPQTKAA  |
| Colinc | 48 | YQYYIHGSGKTTTEYVNLSEDFKNPADTASKQGAKISLTSTAFWNGQNMRRTELIPQTSAA  |
| Colsim | 48 | YQYYIHGSGATTDYVNLSSDFKNPADTGSKQGAKISLTSTSEFWNGQTMRRTELIPQTIAA  |
| Veralf | 49 | YQYYIHGSGPVTTEYVNLSPSYKNPADSGSKQGVKISLTDTAYWNGQNMRRTELIPQTSAA  |
| Verlon | 49 | YQYYIHGSGPVTTEYVNLSPSYKNPADSGSKQGVKISLTDTAYWNGQNMRRTELIPQTSAA  |
| Verdah | 48 | YQYYIHGSGPVTTEYVNLSPSYKNPADSGSKQGVKISLTDTAYWNGQNMRRTELIPQTSAA  |
| Conlig | 48 | YQYYIHGSSPVTAYVNLSPSYKNPADAGSKQGAKITLDSTSYWNGQTMRRTELIPQTAAP   |
| Neucra | 48 | YQYYIHGPPSEVTSYVNLSPSEKNPADSGSSQGAKITLDKTAFWNGQTMRRTELIPQTIAA  |
| Neutet | 48 | YQYYIHGPPSEVTSYVNLSPSEKNPADSGSSQGAKITLDKTAFWNGQTMRRTELIPQTIAA  |
| Sormac | 48 | YQYYIHGSSSEVTSYVNLSPSYKNPADSGSNQGAKITLDNTAYWNGQNMRRTELIPQTIAA  |
| Madmyc | 48 | YQYYIHGPPSEVTAYVNLSPDYKNPADSGSQGAKITLDDTAYWNGQNMRRTELIPQTSAA   |
| Podans | 48 | YQYYIHGSSPVSAYVNLSPDYKNPADTGSQGAKITLDNTAYWNGQNMRRTELIPQTIAA    |
| Chaglo | 48 | YQYYIHGSSSVTSYVNLSPDYKNPADSGSKQGAKITLDNTAYWNGQNMRRTELIPQTIAP   |
| Thethe | 48 | YQYYIHGSSSVTAYVNLSPDYKNPADSGSKQGAKITLDNTAYWNGQNMRRTELIPQTSAA   |
| Thiter | 48 | YQYYIHGPPSVTAYVNLSPDYKNPADTGSKQGAKITLDSTSYWNGQNMRRTELIPQTSAA   |
| Chathe | 45 | YQYYIHGSSPVTAYVNLSPSYKNPFEDAGSKQGAKITLDRAYWNGQNMRRTELIPQTIAP   |
| Gaetri | 51 | YQYYIHGSSPVASYNLSPSYKNPADASQGAKITLDSTAYWNGQNMRRTELIPQTIAA      |
| Magory | 48 | YQYYIHGSSPVTSYVNLSPSHKNPADTTSKQGAKITLDSTAYWNGQNMRRTELIPQTIAA   |
| Maggri | 48 | YQYYIHGSSPVASYVDLSPSHKNPADTTSKQGAKITLDSTAYWNGQNMRRTELIPQTIAA   |
| Stacha | 50 | YQYYIHGNGPVSSEYVALSPDYKNPADSGSSKGITKISLTDTAYWNGQNMRRTELIPQTSAA |
| Stachl | 50 | YQYYIHGNGPVSSEYVALSPDYKNPADSGSSKGITKISLTDTAYWNGQNMRRTELIPQTSAA |
| Micbol | 47 | YQYYIHGSGKTTTEYVNLSPAYKNAADSASNOGVKISLTNSAYWNGQNMRRTELIPQTKAA  |
| Colfio | 44 | YQYYIHGSGDVTKYVNLSPSYKNPADTASKQGVKITLDSTAYWNGQNMRRTELIPQTKAA   |
| Colnym | 44 | YQYYIHGSGDVTKYVNLSPSYKNPADTASKQGVKITLDSTAYWNGQNMRRTELIPQTKAA   |
| Colsal | 44 | YQYYIHGSGDVTKYVNLSPSYKNPDASKQGVKITLDSTAYWNGQNMRRTELIPQTKAA     |
| Colgra | 44 | YQYYIHGSGDVAKYVNLSPSYKNPDASKQGVKITLDSTAYWNGQNMRRTELIPQTKAA     |
| Colsub | 44 | YQYYIHGSGDVTKYVNLSPSYKNPDNTASKQGVKITLDSTAYWNGQNMRRTELIPQTKAA   |
| Coltof | 44 | YQYYIHGSGDVTKYVNLSPSYKNPDNTASKQGVKITLDSTAYWNGQNMRRTELIPQTKAA   |
| Colorb | 44 | YQYYIHGPGDVTKYVNLSPSYKNPADTASKQGVKITLDSTAYWNGQNMRRTELIPQTKAA   |
| Colglo | 44 | YQYYIHGSGDVTKYVNLSPDYKNPADTASKQGVKITLDSTAYWNGQNMRRTELIPQTKAA   |
| Phamin | 46 | YQYYIHGSGTVEKYVNLSPDYKNPDNTVSKQGAKITLDSTAFWNGQNMRRTELIPQTIAG   |
| Pesfic | 42 | YQYYIHGSGTVDKYINLGTSFKNPNDTSSKQGAKITLDSTAYWNGQNMRRTELIPQTIAG   |
| Psevex | 42 | YQYYIHGSGTVDKYVNLSPDYKNPDNTVSKQGAKITLDSTAFWNGQTMRRTELIPQTIAG   |
| Rosnec | 46 | YQYYIHGSSGVDRYVNLSPDYKNPADTASQGAKITLDSTAFWNGQNMRRTELIPQTKAA    |
| Daldsp | 44 | YQYYIHGSGSVEKYINFSPDYKNPADTVSKQGAKITLDSTAFWNGQNMRRTELIPQTKAA   |
| Hyposp | 44 | YQYYIHGSGSVEKYINFSPDYKNPADKVSKQGAKITLDSTAFWNGQNMRRTELIPQTKAA   |
| Ophpic | 44 | YQYYIHGSGTVDEYIALSPDYKNPHDTVAKQGAKITLDSTAYWNGQNMRRTELIPQTKAA   |
| Spobra | 46 | YQYYIHGSGTVNKYIALSPSYKNPNDTVSKQGAKITLDSTSEFWNGQTMRRTELIPQTKAA  |
| Sposch | 46 | YQYYIHGSGTVNKYIALSPSYKNPNDTVSKQGAKITLDSTSEFWNGQTMRRTELIPQTKAA  |
| Spoins | 53 | YQYYIHGSGTVDKYIALSPDYKNPNDTVSKQGAKITLDSTSEFWNGQTMRRTELIPQTKAA  |
| Lompro | 47 | YQYYIHGSSSATSYVNLSEDFKNPADTSSKQGAKITLDGTAFWNGQTMRRTELIPQTIAG   |
| Sceapi | 47 | YQYYIHGSSPTSSYVNLSEDFKNPADTSSKQGAKITLDGTAFWNGQTMRRTELIPQTIAG   |
| Diaamp | 48 | YQYYIHGSGSVTEYVNLSPSYKNPADTSSKQGAKITLNTAYWNGQNMRRTELIPQTSAA    |
| Neodit | 45 | YQYYIHGDGEVTEYVNLAADEANPADAGSSQGAKITLTDTAYWNGQTMRRTELIPQTSAA   |
| Eutlat | 47 | YQYYIHGPSATADYVDLSADYKNPADESSTKGVKITLDSTAFWNGQNMRRTELIPQTIAG   |
| Conlus | 55 | YQYYIHGDGPVTEYINLSAAYKNPADTASQGAKITLDDTAYWNGQTMRRTELIPQTIAG    |
| Cerpla | 45 | YQYYIHGSGEVTEYVNLADYKNPADTGSNOGAKITLNTAYWNGQNMRRTELIPQTIAG     |
| Thipun | 44 | YQYYIHGSGDLSDYVDISTDFKNPDCNSSEYGAKITLSTSTSYWNGQNMRRTELIPSTKAA  |

|        |     |   |   |   |   |   |   |   |   |   |   |   |   |   |   |   |   |     |   |   |   |   |   |   |   |   |   |   |   |   |   |   |   |   |   |   |   |   |   |   |   |   |   |   |   |   |   |   |   |   |   |   |   |   |   |   |   |   |   |   |   |
|--------|-----|---|---|---|---|---|---|---|---|---|---|---|---|---|---|---|---|-----|---|---|---|---|---|---|---|---|---|---|---|---|---|---|---|---|---|---|---|---|---|---|---|---|---|---|---|---|---|---|---|---|---|---|---|---|---|---|---|---|---|---|---|
| Colchl | 108 | I | A | K | G | K | V | Y | H | F | S | I | K | R | S | D | V | N   | A | P | S | I | N | K | E | H | Q | I | A | F | F | E | S | H | F | V | E | M | K | S | G | W | Q | S | G | A | A | G | T | E | D | P | L | L | R | W | V | V | G | G |   |
| Colhig | 108 | I | A | K | G | K | V | Y | H | F | S | I | K | R | S | D | T | N   | A | P | S | I | N | K | E | H | Q | I | A | F | F | E | S | H | F | V | E | M | K | S | G | W | Q | S | G | A | T | G | T | E | D | P | L | L | R | W | V | V | G | G |   |
| Colinc | 108 | I | A | K | G | K | V | Y | H | F | S | I | K | R | T | D | T | N   | A | P | S | I | N | K | E | H | Q | I | A | F | F | E | S | H | F | V | E | M | K | S | G | W | Q | S | G | A | T | G | T | E | D | P | L | L | R | W | V | V | G | G |   |
| Colsim | 108 | I | G | K | G | K | L | F | Y | H | F | S | I | K | R | S | D | T   | N | A | P | S | I | N | K | E | H | Q | I | A | F | F | E | S | H | F | V | E | M | K | S | G | W | Q | S | G | A | T | G | T | E | D | P | L | L | R | W | V | V | G | G |
| Veralf | 109 | I | N | K | G | K | V | E | Y | H | F | S | I | K | R | S | D | V   | N | P | P | A | T | T | R | E | H | Q | I | A | F | F | E | S | H | F | T | E | L | K | S | G | W | L | S | G | A | A | G | T | S | D | P | L | L | R | W | C | V | G | G |
| Verlon | 109 | I | N | K | G | K | V | E | Y | H | F | S | I | K | R | S | D | V   | N | P | P | A | T | T | R | E | H | Q | I | A | F | F | E | S | H | F | T | E | L | K | S | G | W | L | S | G | A | A | G | T | S | D | P | L | L | R | W | C | V | G | G |
| Verdah | 108 | I | N | K | G | K | V | E | Y | H | F | S | I | K | R | S | D | V   | N | P | P | A | T | T | R | E | H | Q | I | A | F | F | E | S | H | F | T | E | L | K | A | G | W | L | S | G | A | A | G | T | S | D | P | L | L | R | W | C | V | G | G |
| Conlig | 108 | I | N | Q | G | K | V | E | Y | H | L | S | I | M | R | S | D | T   | N | P | P | A | Q | T | R | E | H | Q | I | A | F | F | E | S | H | F | T | E | L | K | A | G | W | L | S | G | A | A | G | V | S | D | P | L | L | R | W | C | V | G | G |
| Neucra | 108 | I | N | K | G | K | V | E | Y | H | F | S | I | M | R | K | D | T   | N | A | P | A | T | T | R | E | H | Q | I | A | F | F | E | S | H | F | T | E | L | K | S | G | W | Q | S | G | A | A | G | T | S | D | P | L | L | R | W | C | I | G | G |
| Neutet | 108 | I | N | K | G | K | V | E | Y | H | F | S | I | M | R | K | D | T   | N | A | P | A | T | T | R | E | H | Q | I | A | F | F | E | S | H | F | T | E | L | K | S | G | W | Q | S | G | A | S | G | T | S | D | P | L | L | R | W | C | I | G | G |
| Sormac | 108 | I | N | Q | G | K | V | E | Y | H | F | S | I | M | R | K | D | T   | N | A | P | A | T | T | R | E | H | Q | I | A | F | F | E | S | H | F | T | E | L | K | S | G | W | Q | S | G | A | S | G | I | S | D | P | L | L | R | W | C | I | G | G |
| Madmyc | 108 | I | N | S | G | K | V | Y | H | F | S | I | M | R | K | D | V | N   | P | P | A | T | T | R | E | H | Q | I | A | F | F | E | S | H | F | T | E | L | K | S | G | W | L | S | G | A | P | G | I | S | D | T | L | L | R | W | C | V | G | G |   |
| Podans | 108 | I | N | Q | G | K | V | Y | H | F | S | I | M | R | K | D | T | N   | A | P | A | T | T | R | E | H | Q | I | A | F | F | E | S | H | F | T | E | L | K | S | G | W | L | S | G | A | P | G | I | S | D | T | L | L | R | W | C | V | G | G |   |
| Chaglo | 108 | I | A | Q | G | K | V | Y | H | F | S | I | M | R | K | D | T | N   | A | P | A | T | T | R | E | H | Q | I | A | F | F | E | S | H | F | T | E | L | K | A | G | W | L | S | G | A | P | G | V | S | D | T | L | L | R | W | C | V | G | G |   |
| Thethe | 108 | I | N | Q | G | K | V | Y | H | F | S | I | M | R | K | N | T | N   | P | P | A | T | T | R | E | H | Q | I | A | F | F | E | S | H | F | T | E | L | K | S | G | L | L | S | G | A | P | G | E | S | D | S | L | L | R | W | C | V | G | G |   |
| Thiter | 108 | I | N | K | G | K | V | Y | H | F | S | I | M | R | K | D | T | N   | A | P | A | T | T | R | E | H | Q | I | A | F | F | E | S | H | F | T | E | L | K | S | G | L | L | S | G | A | S | G | V | S | D | T | S | L | R | W | C | V | S | G |   |
| Chathe | 105 | I | N | R | G | K | V | Y | H | F | S | I | M | R | K | D | V | N   | A | P | A | T | T | R | E | H | Q | I | A | F | F | E | S | H | F | T | E | L | K | S | G | W | L | S | G | S | P | G | T | E | D | T | K | L | R | W | C | V | S | G |   |
| Gaetri | 111 | I | N | K | G | K | V | Y | H | F | S | I | K | R | S | D | V | N   | P | P | A | T | T | R | E | H | Q | I | A | F | F | E | S | H | F | T | E | L | K | S | G | W | L | S | G | A | P | G | T | S | D | P | A | L | R | W | M | V | N | Q |   |
| Magory | 108 | I | N | Q | G | K | V | E | Y | H | F | S | I | K | R | S | D | V   | N | A | P | A | T | T | R | E | H | Q | I | A | F | F | E | S | H | F | T | E | L | K | S | G | W | L | S | G | A | P | G | T | S | D | P | A | L | R | W | M | V | N | Q |
| Maggri | 108 | I | N | Q | G | K | V | E | Y | H | F | S | I | K | R | S | D | V   | N | P | P | A | T | T | R | E | H | Q | I | A | F | F | E | S | H | F | T | E | L | K | S | G | W | L | S | G | A | P | G | T | S | D | P | A | L | R | W | M | V | N | Q |
| Stacha | 110 | I | A | S | G | R | V | E | Y | H | F | S | I | K | R | E | D | V   | N | A | P | A | T | T | R | E | H | Q | I | A | F | F | E | S | H | F | T | E | L | K | S | G | W | L | S | G | A | P | G | I | E | D | P | L | L | R | W | Q | V | G | G |
| Stachl | 110 | I | A | S | G | R | V | E | Y | H | F | S | I | K | R | E | D | V   | N | A | P | A | T | T | R | E | H | Q | I | A | F | F | E | S | H | F | T | E | L | K | S | G | W | L | S | G | A | P | G | I | E | D | P | L | L | R | W | Q | V | G | G |
| Micbol | 107 | I | A | S | G | K | V | Y | H | F | S | I | K | R | S | N | T | N   | A | P | A | Q | T | R | E | H | Q | I | A | F | F | E | S | H | F | T | E | L | K | S | G | L | L | S | G | O | P | G | T | S | D | P | A | L | R | W | M | V | G | G |   |
| Colfio | 104 | I | N | S | G | K | V | Y | H | F | S | I | S | R | K | D | T | N   | A | P | S | I | F | R | E | H | Q | I | A | F | F | E | S | H | F | T | E | L | K | S | G | W | L | S | G | E | S | A | T | N | N | T | N | L | Q | F | M | V | Q | Q |   |
| Colnym | 104 | I | N | S | G | K | V | Y | H | F | S | I | S | R | K | D | T | N   | A | P | S | I | F | R | E | H | Q | I | A | F | F | E | S | H | F | T | E | L | K | S | G | W | L | S | G | E | S | A | T | N | N | T | N | L | Q | F | M | V | Q | Q |   |
| Colsal | 104 | I | N | S | G | K | V | Y | H | F | S | I | S | R | K | D | V | N   | A | P | S | I | F | R | E | H | Q | I | A | F | F | E | S | H | F | T | E | L | K | S | G | W | L | S | G | E | S | A | T | S | N | T | N | L | Q | F | M | V | Q | Q |   |
| Colgra | 104 | I | A | S | G | K | V | Y | H | F | S | I | S | R | K | D | V | N   | A | P | S | I | F | R | E | H | Q | I | A | F | F | E | S | H | F | T | E | L | K | S | G | W | L | S | G | E | Q | G | T | S | N | N | N | L | Q | F | M | V | Q | Q |   |
| Colsub | 104 | I | A | S | G | K | V | Y | H | F | S | I | S | R | K | D | A | N   | A | P | S | I | F | R | E | H | Q | I | A | F | F | E | S | H | F | T | E | L | K | S | G | W | L | S | G | E | Q | G | T | S | N | N | N | L | Q | F | M | V | Q | Q |   |
| Coltof | 104 | I | A | S | G | K | V | Y | H | F | S | I | S | R | K | D | V | N   | A | P | S | I | F | R | E | H | Q | I | A | F | F | E | S | H | F | T | E | L | K | S | G | W | L | S | G | E | Q | A | T | S | N | T | N | L | Q | F | M | V | Q | Q |   |
| Colorb | 104 | I | A | S | G | K | V | Y | H | F | S | I | S | R | K | D | V | N   | A | P | S | I | F | R | E | H | Q | I | A | F | F | E | S | H | F | T | E | L | K | S | G | W | L | S | G | E | Q | A | A | S | N | P | N | L | Q | F | M | V | Q | Q |   |
| Colglo | 104 | I | N | S | G | K | V | Y | H | F | S | I | M | R | K | D | T | N   | A | P | S | I | F | R | E | H | Q | I | A | F | F | E | S | H | F | T | E | L | K | S | G | W | L | S | G | E | S | A | T | S | N | A | N | L | Q | F | M | V | Q | Q |   |
| Phamin | 106 | I | N | K | G | K | V | Y | H | F | S | I | M | R | S | D | K | N   | A | P | S | I | N | K | E | H | Q | I | N | F | F | E | S | H | F | T | E | L | K | Y | G | W | L | S | G | E | S | G | T | S | N | P | N | L | Q | M | V | S | Q |   |   |
| Pesfic | 102 | I | N | S | G | K | V | Y | H | F | S | I | S | R | S | D | T | N   | A | P | S | I | N | K | E | H | Q | I | C | F | F | E | S | H | F | T | E | L | K | Y | G | W | L | S | G | E | S | G | T | S | D | P | Y | L | Q | F | M | I | S | Q |   |
| Psevex | 102 | I | N | K | G | K | V | Y | H | F | S | I | L | R | K | D | T | N   | A | P | S | I | N | K | E | H | Q | I | N | F | F | E | S | H | F | T | E | M | K | Y | G | W | L | S | G | E | S | G | T | S | N | P | A | L | Q | F | M | I | S | Q |   |
| Rosnec | 106 | I | N | S | G | K | V | Y | H | F | S | I | M | R | K | D | T | N   | A | P | S | I | N | K | E | H | Q | I | C | F | F | E | S | H | F | T | E | M | K | S | G | W | L | S | G | E | Q | G | T | S | N | P | N | L | Q | F | M | V | S | Q |   |
| Daldsp | 104 | I | N | S | G | K | V | E | Y | H | F | S | I | M | R | K | D | T   | N | A | P | S | I | N | K | E | H | Q | I | C | F | F | E | S | H | F | T | E | L | K | Y | G | W | L | S | G | E | Q | G | T | E | N | P | N | L | Q | F | M | V | S | Q |
| Hyposp | 104 | I | N | S | G | K | V | E | Y | H | F | S | I | S | R | K | D | T   | N | A | P | S | I | N | K | E | H | Q | I | C | F | F | E | S | H | F | T | E | L | K | Y | G | W | L | S | G | E | Q | G | T | E | N | P | N | L | Q | F | M | I | S | Q |
| Ophpic | 104 | I | A | S | G | K | V | E | Y | H | F | S | I | M | R | K | D | T   | N | A | P | S | I | N | K | E | H | Q | I | C | F | F | E | S | H | F | T | E | L | K | S | G | W | L | S | G | E | Q | G | T | S | N | P | N | L | Q | M | V | S | Q |   |
| Spobra | 106 | I | A | S | G | K | V | E | Y | H | F | S | I | M | R | K | D | T</ |   |   |   |   |   |   |   |   |   |   |   |   |   |   |   |   |   |   |   |   |   |   |   |   |   |   |   |   |   |   |   |   |   |   |   |   |   |   |   |   |   |   |   |

|        |     |                                                               |
|--------|-----|---------------------------------------------------------------|
| Colchl | 168 | KTEWSANWDADVWHNVAYEIDFDAGSVGFWHSTGSDALKQVVAPVKASTQSNGADWHVGV  |
| Colhig | 168 | KTEWSVNWDADVWHNVAYEIDFDAGSVGFWHSTGSEALTQVVAPVIAAASSNGADWHVGV  |
| Colinc | 168 | KTEWSVNWDADVWHNVAYEIDFDAGSVGFWHSTGSAALTQVVAPVIAAASSNGADWHVGV  |
| Colsim | 168 | KTEWSVNWDADVWHNVAYEIDFDAGSVGFWHSTGSAALTQVVAPVIAAASSNGADWHVGV  |
| Veralf | 169 | QTHWSVNWDADVWHNVAYEIDFSAGTVGFWHSTGASSLTRVNAPVAASTSSNGADWHLGV  |
| Verlon | 169 | QTHWSVNWDADVWHNVAYEIDFSAGTVGFWHSTGASPLNRVNAPVAASTSSNGADWHLGV  |
| Verdah | 168 | QTHWSVNWDADVWHNVAYEIDFSAGTVGFWHSTGASPLTRVNAPVAASTSSNGADWHLGV  |
| Conlig | 168 | NTKWSVNWDADVWHNVAYEIDFSANTVGFWHSTGGDNLVQVVAPQSVSTSSNGADWHVGV  |
| Neucra | 168 | QTKWSVNWDADVWHNVAYEIDFDANTVGFWHSTGSDALTQVIAPOAAGTSSNGADWHVGV  |
| Neutet | 168 | QTKWSVNWDADVWHNVAYEIDFDANTVGFWHSTGSDALTQVIAPOAAGTSSNGADWHVGV  |
| Sormac | 168 | QTKWSVNWDADVWHNVAYEIDFSANTVGFWHSTGSDDLVRVIAPOSASTSSNGADWHVGV  |
| Madmyc | 168 | QTQWSTEWEADVWHNVAYEIDFGAGTVGFWHSTGSDPLTQKVAPVSASTSSNGADWHVGV  |
| Podans | 168 | QTQWSTEWEADVWHNVAYEIDFAAGTVGFWHSTGSDPLTRKVAPVKTSTSSNGADWHVGV  |
| Chaglo | 168 | QTKWSTEWEADVWHNVAYEIDFSANTVGFWHSTGGDALTQKVAPVSTSTSSNGADWHVGV  |
| Thethe | 168 | QTQWSTEWEADVWHNVAYEIDFSANTVGFWHSTGSDPLTQKVAPVASTSSNGADWHVGV   |
| Thiter | 168 | QTQWSTEWEADVWHNVAYEIDFDANTVGFWHSTGSDALVQVVAPVSVSTSSNGADWHVGV  |
| Chathe | 165 | QTHWSVEWEADVWHNVAYEIDFSAGTVGLWHSENGEPLKRIVDPVRTSASSDGGKDWHLGV |
| Gaetri | 171 | QTKWSVDWAAGVWHNVAYEIDFGAGTVGFWHSTGADPLTRTVAPVSVSTSSNGADWHLGV  |
| Magory | 168 | QTKWSVDWAADVWHNVAYEIDFAANTVGFWHSTGASPLQRTVAPVSVSTSSNGADWHVGV  |
| Maggri | 168 | QTKWSVDWAADVWHNVAYEIDFSANTVGFWHSTGGDPLQRTVAPVSVSTSSNGADWHVGV  |
| Stacha | 170 | QTRWSVNWEAGVWHNVAYEIDFAGTVGFWHSTGSSNLQRTVAPVSASTSSNGADWHLGV   |
| Stachl | 170 | QTRWSVNWEAGVWHNVAYEIDFARTVGFWHSTGSSNLQRTVAPVSASTSSNGADWHLGV   |
| Micbol | 167 | VTKWSVNWDADVWHNVAYEIDFSANKVGFWHSTGSGDLVQTVAPVASTSSNGADWHLGV   |
| Colfio | 164 | KSLWKTEWKPDVWHNVAYEINFSSGSGVGFWHSEGSAPLQVVAPVSASTSSNGADWHLGV  |
| Colnym | 164 | KSLWKTEWKPDVWHNVAYEINFSSGSGVGFWHSEGSAPLQVVAPVSASTSSNGADWHLGV  |
| Colsal | 164 | KSLWKTEWKPDVWHNVAYEINFSSGSGVGFWHSEGSAPLQVVAPVSASTSSNGADWHLGV  |
| Colgra | 164 | KSLWKTEWKPDVWHNVAYEINFSSGSGVGFWHSEGSAPLQVVAPVSASTSSNGADWHLGV  |
| Colsub | 164 | KSLWKTEWKPDVWHNVAYEINFSSGSGVGFWHSEGNAPLQVVAPVSAPTSSNGADWHLGV  |
| Coltof | 164 | KSLWKTEWKPDVWHNVAYEINFSSGSGVGFWHSEGGAPLQVVAPVSASTSSNGADWHLGV  |
| Colorb | 164 | KSLWKTEWKPDVWHNVAYEINFSSGSGVGFWHSEGSAPLQVVAPVSASTSSNGADWHLGV  |
| Colglo | 164 | KSLWKAWEWKAGVWHNVAYEINFSSGSGVGFWHSEGSAPLQVVAPVSASTSSNGADWHLGV |
| Phamin | 166 | KSYWKTEWTPGVWHNVAYEIDFSANKVGFWHSTGGDPLTQVVAPVSVSTSSNGADWHLGV  |
| Pesfic | 162 | NSKWKTEWKAGVWHNVAYEIDFSKNVGFWHSEGGAPLTQVVAPQASASTSSNGADWHLGV  |
| Psevex | 162 | NSKWKTEWLPDVWHNVAYEIDFSANTVGFWHSEGSAPLTQVVKPASASTSSNGADWHLGV  |
| Rosnec | 166 | NSKWKTEWKANVWHNVAYEIDFSRNTVGLWHSEGSPLAQVAPVSASTSSNGADWHLGV    |
| Daldsp | 164 | NSKWKTEWKPNVWHNVAYEIDFSSTVGFWHSEGAALTKQVAPVKTSTSSNGADWHLGV    |
| Hyposp | 164 | NSKWKTEWKPNVWHNVAYEIDFGAGTVGFWHSEGAALTKQVAPVKTSTSSNGADWHLGV   |
| Ophpic | 164 | QSQWKTEWKPDVWHNVAYEIDFS-GTVGFWHSEGGDPLKQVVAPVSVSASSNGADWHLGV  |
| Spobra | 166 | KSQWKTEWKPDVWHNVAYEIDFS-GKVGFWHSEGGDPLKQVVAPVSVSASSNGADWHLGV  |
| Sposch | 166 | KSQWKTEWKPDVWHNVAYEIDFA-GKVGFWHSEGGDPLKQVVAPVSVSASSNGADWHLGV  |
| Spoins | 173 | KSQWKTEWKPDVWHNVAYEIDFS-CHVGFWHSEGGDPLTQVVAPVAVSASSNGADWHLGV  |
| Lompro | 167 | KGLWKTEWVPDVWHNVAYEIDFGANTVGFWHSEGADPLEQVVAPVAASTSSNGADWHLGV  |
| Sceapi | 167 | KGLWKTEWAPDVWHNVAYEIDFGANKVGFWHSEGDPLTQKVAPVAASTSSNGADWHLGV   |
| Diaamp | 168 | VSKWSTNETAGVWHNVAYEIDFSANTVGFWHSTGSDPLELTVSPVSASTSSNGADWHLGV  |
| Neodit | 160 | TSKWEAEWAAGVWHNVAYEIDFASSTVGLWHSTGADALTQVVKPVASTSSNGADWHVGV   |
| Eutlat | 167 | TTEWSTEELPEVWHNVAYEIDFSANTVGFWHSTGADLKTTEPVSASTSSNGADWHLGV    |
| Conlus | 175 | VTQWSTEFEAGVWYNVAYEINFAGTVGFWHSTGGDNLVQTVAPVAAASSNGADWHLGV    |
| Cerpla | 165 | KSQWKAWEWAAGVWHNVAYEIDFDANTVGFWHSTGSDPLTKVVDVSVTAISDGGKDWHLGV |
| Thipun | 164 | KSQWKATWEPNVWHNVAYEIDFSSTVGFWHSTGSDALTQVVDVGVSAQSSNGADWHVGV   |

|        |     |   |   |   |   |   |   |   |   |   |   |   |   |   |   |   |   |   |   |   |   |   |   |   |   |   |   |   |   |   |   |   |    |   |   |   |
|--------|-----|---|---|---|---|---|---|---|---|---|---|---|---|---|---|---|---|---|---|---|---|---|---|---|---|---|---|---|---|---|---|---|----|---|---|---|
| Colchl | 228 | L | E | L | P | R | D | G | Y | P | D | E | T | E | D | F | Y | F | S | G | V | Y | I | E | D | G | E | I | T | T | A | V | S  | G | S | S |
| Colhig | 228 | L | E | L | P | R | D | G | Y | P | D | E | T | E | D | F | Y | F | S | G | V | Y | I | E | D | G | E | I | T | T | S | V | S  | G | A |   |
| Colinc | 228 | L | E | L | P | R | D | G | Y | P | D | E | T | E | D | F | Y | F | S | G | V | Y | I | E | N | G | E | I | T | T | S | V | S  | G | S |   |
| Colsim | 228 | L | E | L | P | R | D | G | Y | A | D | E | T | E | D | F | Y | F | S | G | V | Y | I | E | D | G | E | I | T | K | A | V | -- | G | S |   |
| Veralf | 229 | L | E | L | P | R | S | G | Y | P | D | A | P | E | D | I | Y | F | S | G | V | Y | I | E | D | G | T | I | T | T | S | V | A  | G | P |   |
| Verlon | 229 | L | E | L | P | R | S | G | Y | P | D | A | P | E | D | I | Y | F | S | G | V | Y | I | E | D | G | T | I | T | T | S | V | A  | G | P |   |
| Verdah | 228 | L | E | L | P | R | S | G | Y | P | D | A | P | E | D | I | Y | F | S | G | V | Y | I | E | D | G | T | I | T | T | S | V | A  | G | P |   |
| Conlig | 228 | L | E | L | P | R | D | G | Y | P | D | S | T | E | D | Y | F | S | G | V | Y | I | E | S | G | S | I | T | T | S | V | S | G  | P |   |   |
| Neucra | 228 | L | E | L | P | R | D | G | Y | A | D | A | T | E | D | F | Y | F | S | G | V | Y | I | E | S | G | S | I | T | T | S | V | A  | G | P |   |
| Neutet | 228 | L | E | L | P | R | D | G | Y | A | D | A | T | E | D | F | Y | F | S | G | V | Y | I | E | S | G | S | I | T | T | S | V | A  | G | P |   |
| Sormac | 228 | L | E | L | P | R | D | G | Y | P | D | T | T | E | D | Y | F | S | G | V | Y | I | E | S | G | S | I | T | T | S | V | S | G  | P |   |   |
| Madmyc | 228 | L | E | L | P | R | S | G | Y | P | D | S | T | E | D | F | Y | F | S | G | V | Y | I | E | S | G | D | I | T | T | S | V | A  | G | P |   |
| Podans | 228 | L | E | L | P | R | S | G | Y | P | D | S | N | E | D | F | Y | F | S | G | V | Y | I | E | S | G | S | I | T | T | S | V | A  | G | P |   |
| Chaglo | 228 | L | E | L | P | R | S | G | Y | S | D | S | N | E | D | Y | F | S | G | V | Y | I | E | S | G | S | I | T | T | N | V | A | G  | P |   |   |
| Thethe | 228 | L | E | L | P | R | S | G | Y | P | D | T | T | E | D | Y | F | S | G | V | Y | I | E | S | G | S | I | T | T | N | I | A | G  | P |   |   |
| Thiter | 228 | L | E | L | P | R | S | G | Y | P | D | T | T | E | D | F | Y | F | S | G | V | Y | I | E | S | G | S | I | T | T | S | V | S  | G | P |   |
| Chathe | 225 | L | E | L | P | R | S | G | Y | N | D | F | E | D | F | Y | F | S | G | V | Y | I | E | N | G | E | I | T | T | S | V | S | G  | P |   |   |
| Gaetri | 231 | L | E | L | P | R | S | G | Y | P | D | A | V | E | D | F | Y | F | S | G | V | Y | I | E | T | G | S | I | T | T | A | I | G  | T | G |   |
| Magory | 228 | L | E | L | P | R | S | G | Y | P | D | A | V | E | D | F | Y | F | S | G | V | Y | I | E | T | G | S | I | T | T | A | I | G  | D | G |   |
| Maggri | 228 | L | E | L | P | R | S | G | Y | P | D | A | V | E | D | F | Y | F | S | G | V | Y | I | E | T | G | S | I | T | T | A | I | G  | D | G |   |
| Stacha | 230 | L | E | L | P | R | S | G | Y | A | D | E | N | E | D | F | Y | F | S | G | V | Y | I | E | N | G | E | I | T | T | S | V | S  | G | P |   |
| Stachl | 230 | L | E | L | P | R | S | G | Y | A | D | E | N | E | D | F | Y | F | S | G | V | Y | I | E | N | G | E | I | T | T | S | V | S  | G | P |   |
| Micbol | 227 | L | E | L | P | R | S | G | Y | S | D | S | N | E | D | F | Y | F | S | G | V | Y | I | E | S | G | S | I | T | K | S | V | T  | G | P |   |
| Colfio | 224 | L | E | L | P | R | D | G | Y | A | D | T | N | E | D | F | Y | F | S | G | V | Y | I | E | D | T | A | I | T | T | S | V | T  | G | P |   |
| Colnym | 224 | L | E | L | P | R | D | G | Y | A | D | T | N | E | D | F | Y | F | S | G | V | Y | I | E | D | T | A | I | T | T | S | V | T  | G | P |   |
| Colsal | 224 | L | E | L | P | R | D | G | Y | A | D | T | N | E | D | F | Y | F | S | G | V | Y | I | E | D | T | A | I | T | T | S | V | T  | G | P |   |
| Colgra | 224 | L | E | L | P | R | S | G | Y | S | D | T | N | E | D | F | Y | F | S | G | V | Y | I | E | D | G | A | I | T | T | S | V | T  | G | P |   |
| Colsub | 224 | L | E | L | P | R | T | G | Y | S | D | T | N | E | D | F | Y | F | S | G | V | Y | I | E | D | G | A | I | T | T | S | V | T  | G | P |   |
| Coltof | 224 | L | E | L | P | R | N | G | Y | A | D | T | E | D | F | Y | F | S | G | V | Y | I | E | D | G | A | I | T | T | S | V | T | G  | P |   |   |
| Colorb | 224 | L | E | L | P | R | N | G | Y | P | D | T | T | E | D | F | Y | F | S | G | V | Y | I | E | D | G | A | I | T | T | S | V | T  | G | P |   |
| Colglo | 224 | L | E | L | P | R | D | G | Y | P | D | S | N | E | D | F | Y | F | S | G | V | Y | I | E | D | T | A | I | T | T | S | V | T  | G | P |   |
| Phamin | 226 | L | E | L | P | R | S | G | Y | S | D | T | T | E | D | F | Y | F | S | G | V | Y | I | E | S | G | S | I | T | T | A | I | G  | G | P |   |
| Pesfic | 222 | L | E | L | P | R | S | G | Y | S | D | A | N | E | D | F | Y | F | S | G | V | Y | I | E | S | G | S | M | T | T | S | V | N  | G | P |   |
| Psevex | 222 | L | E | L | P | R | S | G | Y | S | D | S | N | E | D | F | Y | F | S | G | V | Y | I | E | S | G | T | I | T | T | A | V | S  | G | A |   |
| Rosnec | 226 | L | E | L | P | R | S | G | Y | P | D | T | T | E | D | F | Y | F | S | G | V | Y | I | E | S | G | T | I | T | T | A | I | G  | G | P |   |
| Daldsp | 224 | L | E | L | P | R | S | G | Y | S | D | G | V | E | D | F | Y | F | S | G | V | Y | I | E | S | G | P | I | T | T | S | I | G  | G | P |   |
| Hyposp | 224 | L | E | L | P | R | S | G | Y | P | D | S | V | E | D | F | Y | F | S | G | V | Y | I | E | S | G | P | I | T | T | A | I | G  | G | P |   |
| Ophpic | 223 | L | E | L | P | R | S | S | Y | S | D | T | N | E | D | F | Y | F | S | G | V | Y | I | E | S | G | P | I | T | T | I | I | G  | G | P |   |
| Spobra | 225 | L | E | L | P | R | S | G | Y | N | D | A | N | E | D | F | Y | F | S | G | V | Y | I | E | S | G | P | I | T | T | I | I | G  | G | P |   |
| Sposch | 225 | L | E | L | P | R | S | G | Y | N | D | A | N | E | D | F | Y | F | S | G | V | Y | I | E | S | G | P | I | T | T | I | I | G  | G | P |   |
| Spoins | 232 | L | E | L | P | R | S | G | Y | S | D | G | V | E | D | Y | F | S | G | V | Y | I | E | S | G | P | V | T | T | A | I | G | G  | P |   |   |
| Lompro | 227 | L | E | L | P | R | D | G | Y | P | H | E | N | E | D | F | Y | F | S | G | V | Y | I | E | D | G | T | I | T | T | D | V | A  | G | P |   |
| Sceapi | 227 | L | E | L | P | R | D | G | Y | P | H | Q | N | E | D | F | Y | F | S | G | V | Y | I | E | D | G | T | I | T | T | D | V | S  | G | P |   |
| Diaamp | 228 | L | E | L | P | R | S | G | Y | S | D | S | N | E | D | F | Y | F | S | G | V | Y | I | E | S | G | S | I | T | T | I | I | G  | S | G |   |
| Neodit | 220 | L | E | L | A | - | N | G | D | A | D | E | T | E | D | F | Y | F | S | G | V | Y | I | E | D | G | E | I | T | T | A | I | S  | S | S |   |
| Eutlat | 227 | L | E | L | P | R | D | G | Y | T | D | E | V | E | D | Y | F | S | G | V | Y | I | E | S | G | S | I | T | T | I | S | G | P  | A |   |   |
| Conlus | 235 | L | E | L | P | R | G | G | Y | T | D | T | E | N | L | Y | F | S | G | V | Y | I | E | S | G | S | I | T | T | S | V | S | G  | P |   |   |
| Cerpla | 225 | L | E | L | Q | R | I | G | Y | E | D | A | D | E | D | F | Y | F | S | S | V | Y | I | E | D | G | E | V | T | T | G | F | P  | A | G |   |
| Thipun | 224 | L | E | L | P | R | S | G | Y | T | D | S | N | E | D | F | Y | F | A | G | V | Y | I | E | D | G | D | V | T | T | T | M | C  | G | S |   |

## Sordariomycetes

### **Hypocreomycetidae - Glomerellales**

Colchl = OLN87414.1 hypothetical protein CCHL11\_09568 [Colletotrichum chlorophyti]

SAPAATASAKPACRRRRRRRSNKAKRN

Colfio = EXF79761.1 hypothetical protein CFIO01\_10221 [Colletotrichum fiorinae PJ7]

Colglo = EQB46944.1 hypothetical protein CGLO\_13971 [Colletotrichum gloeosporioides Cg-14]

Colgra = XP\_008089016.1 hypothetical protein GLRG\_00140 [Colletotrichum graminicola M1.001]

Colhig = CCF34200.1 hypothetical protein CH063\_06244 [Colletotrichum higginsianum]

Colinc = KZL80950.1 hypothetical protein CI238\_10924 [Colletotrichum incanum]

Colnym = KXH48861.1 hypothetical protein CNYM01\_04877 [Colletotrichum nymphaeae SA-01]

Colorb = TDZ18371.1 hypothetical protein Cob\_v008530 [Colletotrichum orbiculare MAFF 240422]

Colsim = KXH30104.1 hypothetical protein CSIM01\_00818 [Colletotrichum simmondsii]

Colsal = KXH61778.1 hypothetical protein CSAL01\_07891 [Colletotrichum salicis]

Colsub = KDN72294.1 hypothetical protein CSUB01\_06221 [Colletotrichum sublineola]

Coltof = KZL74381.1 carbohydrate-binding module family 1 protein [Colletotrichum tofieldiae] corrected to remove spurious N-terminal sequence

Veralf = XP\_003008315.1 conserved hypothetical protein [Verticillium alfalfae VaMs.102]

Verdah = KAF3351428.1 Putative transcriptional regulatory protein [Verticillium dahliae VDG2]

Verlon = KAG7128176.1 hypothetical protein HYQ45\_012077 [Verticillium longisporum]

**Hypocreomycetidae - Hypocreales - Clavicipitaceae - no orthologues found**

**Hypocreomycetidae - Hypocreales - Cordycipitaceae - no orthologues found**

**Hypocreomycetidae - Hypocreales - Hypocreaceae - no orthologues found**

**Hypocreomycetidae - Hypocreales - Nectriaceae (but no orthologues found in Fusarium)**

Neodit = KPM42463.1 hypothetical protein AK830\_g4089 [Neonectria ditissima]

**Hypocreomycetidae - Hypocreales - Ophiocordycipitaceae - no orthologues found**

**Hypocreomycetidae - Hypocreales - Stachybotrys**

Stacha = KEY67053.1 hypothetical protein S7711\_10884 [Stachybotrys chartarum IBT 7711]

Stachl = KFA65100.1 hypothetical protein S40285\_03114 [Stachybotrys chlorohalonata IBT 40285]

**Hypocreomycetidae - Microascales**

Cerpla = KKF94894.1 hypothetical protein CFO\_g2760 [Ceratocystis platani]

Thipun = KKA29646.1 hypothetical protein TD95\_000695 [Thielaviopsis punctulata]

Lompro = PKS10019.1 hypothetical protein jhhlp\_004644 [Lomentospora prolificans]

Sceapi = XP\_016641373.1 hypothetical protein SAPIO\_CDS7745 [Scedosporium apiospermum]

**Sordariomycetidae - Coniochaetales**

Conlig = OIW27922.1 carbohydrate-binding module family 1 protein [Coniochaeta ligniaria NRRL 30616]

**Sordariomycetidae - Togniniales**

Phamin = XP\_007910843.1 putative carbohydrate-binding module family 1 protein [Phaeoacremonium minimum UCRPA7]

**Sordariomycetidae - Diaporthales**

Conlus = PSR77661.1 hypothetical protein BD289DRAFT\_377636 [Coniella lustricola]

Diaamp = KKY33924.1 putative carbohydrate-binding module family 1 protein [Diaporthe ampelina]

**Sordariomycetidae - Magnaporthales**

Gaetri = XP\_009223752.1 hypothetical protein GGTG\_07663 [Gaeumannomyces tritici R3-111a-1]

Magory = >QBZ57551.1 hypothetical protein PoMZ\_02480 [Pyricularia oryzae] (syn. Magnaporthe oryzae)

Maggri = XP\_030981300.1 uncharacterized protein PgNI\_07823 [Pyricularia grisea] (syn. Magnaporthe grisea)

**Sordariomycetidae - Ophiostomataceae**

Ophpic = EPE07306.1 carbohydrate-binding module family 1 protein [Ophiostoma piceae UAMH 11346]

Spobra = XP\_040620187.1 uncharacterized protein SPBR\_03181 [Sporothrix brasiliensis 5110]

Spoins = OAA53838.1 hypothetical protein SPI\_09283 [Sporothrix insectorum RCEF 264]

Spotch = XP\_016590501.1 hypothetical protein SPSK\_07902 [Sporothrix schenckii 1099-18]

**Sordariomycetidae - Sordariales - Sordariales incertae sedis**

Madmyc = KXX78310.1 Feruloyl esterase B [Madurella mycetomatis]

**Sordariomycetidae - Sordariales - Chaetomiaceae**

Chaglo = XP\_001228503.1 uncharacterized protein CHGG\_10576 [Chaetomium globosum CBS 148.51]

Chathe = XP\_006690661.1 hypothetical protein CTHT\_0001080 [Chaetomium thermophilum var. thermophilum DSM 1495]

Podans = AFQ89876.1 beta-glucanase [Podospira anserina]

Thethe = XP\_003667321.1 carbohydrate-binding module family 1 protein [Thermothelomyces thermophilus ATCC 42464]

Thiter = SPQ27187.1 1b90b30c-5168-4e91-890b-de3dbdb1dae1 [Thermothielavioides terrestris] (syn. Thielavia terrestris)

**Sordariomycetidae - Sordariales - Sordariaceae**

Neucra = XP\_958348.1 hypothetical protein NCU09764 [Neurospora crassa OR74A]

Neutet = XP\_009851721.1 hypothetical protein NEUTE1DRAFT\_64374 [Neurospora tetrasperma FGSC 2508]

Sormac = XP\_003344812.1 uncharacterized protein SMAC\_09184 [Sordaria macrospora k-hell]

**Xylariomycetidae - Xylariales**

Eutlat = EMR71091.1 putative carbohydrate-binding module family 1 protein [Eutypa lata UCREL1]

Daldsp = OTB20440.1 hypothetical protein K445DRAFT\_312903 [Daldinia sp. EC12]

Hyposp = OTA66562.1 glycoside hydrolase family 131 protein [Hypoxylon sp. EC38]

Micbol = KXJ89759.1 hypothetical protein Micbol1qcDRAFT\_212247 [Microdochium bolleyi]

Pesfic = XP\_007838550.1 hypothetical protein PFICI\_11778 [Pestalotiopsis fici W106-1]

Psevex = XP\_040719926.1 uncharacterized protein BCR38DRAFT\_96685 [Pseudomassariella vexata]

Rosnec = GAP89226.2 putative carbohydrate-binding module family 1 protein [Rosellinia necatrix]

**Supplementary Figure S5. PaGluc131A alignment.** Multiple protein-sequence alignment of the N-terminal

glycosyl hydrolase domains of PaGluc131A orthologues in the PaGluc131A/CcGH131A clade of Sordariomycete GH131 (glycosyl-hydrolase 131) sequences. All sequences shown were the highest blastP matches to PaGluc131A (= Podans highlighted in green in the alignment) obtained for each genome-sequenced species represented. Sequences were aligned using ClustalW at <https://www.ebi.ac.uk/Tools/msa/mafft/>. Amino-acid identities were highlighted in back and similarities in grey using BoxShade at [https://embnet.vital-it.ch/software/BOX\\_form.html](https://embnet.vital-it.ch/software/BOX_form.html). Residues conserved with the catalytic residues of PaGluc131A and CcGH131A have been highlighted manually in red. C-terminal extensions, including those containing CBM1 (carbohydrate binding module 1) domains, were removed manually for the purposes of alignment.
